# Supplementary material
Source: PubMed Central journal article supplement (PMC3844682)
Supplement: NIHMS516588-supplement-1.pdf [file NIHMS516588-supplement-1.pdf]

# Supplemental Fig. 1

## A N-terminal (H208-P231) HR

LC-FT-ICR MS  
RT: 44.00-50.00

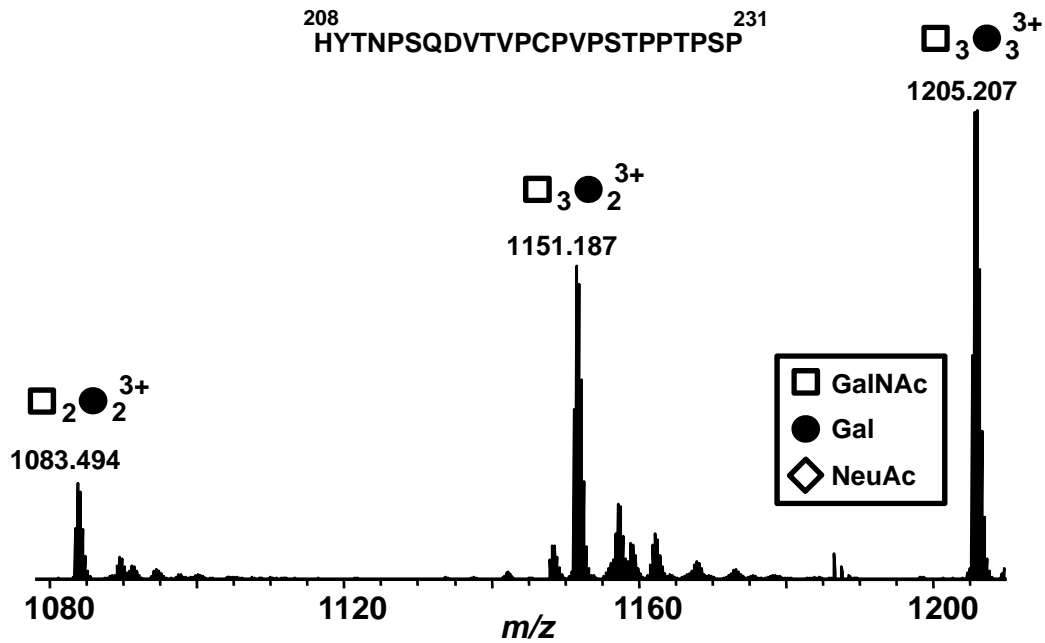

## B

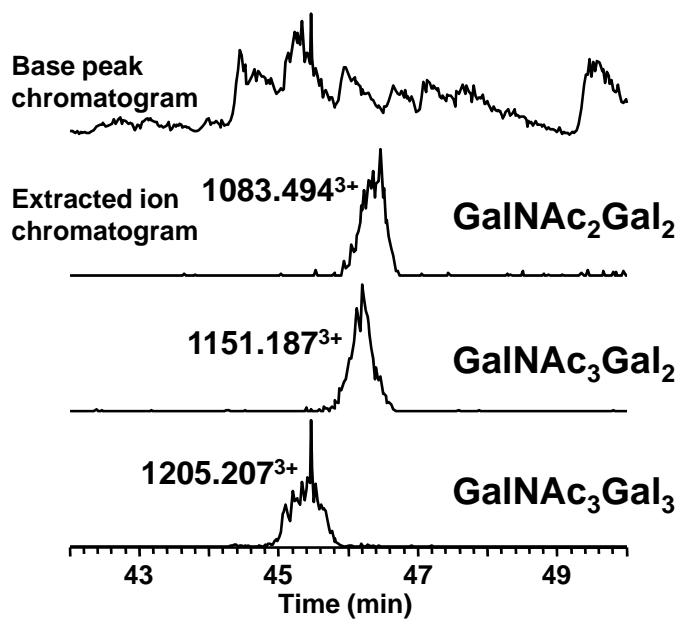

Supplemental Fig. 1. Online LC FT-ICR MS analysis of His<sup>208</sup>-Pro<sup>231</sup> (A) HR glycopeptides of IgA1 (Mce1) myeloma protein. All glycopeptides were detected as triply charged ions. The number of *O*-glycan chains was assigned based on the masses of the amino-acid sequence, GalNAc (open squares), and Gal (full circles). The *m/z* values for the observed glycopeptides, retention time, relative abundance, mass error, and site-specific *O*-glycosylation are summarized in Supplemental Table 1. XIC of three dominant glycopeptides in N-terminal (B) HR fragments were individually extracted for the specific *m/z* of glycopeptides. Single peak was observed for the each of the His<sup>208</sup>-Pro<sup>231</sup> glycoforms.

# Supplemental Fig. 2

**A** B3 (28-30 min)

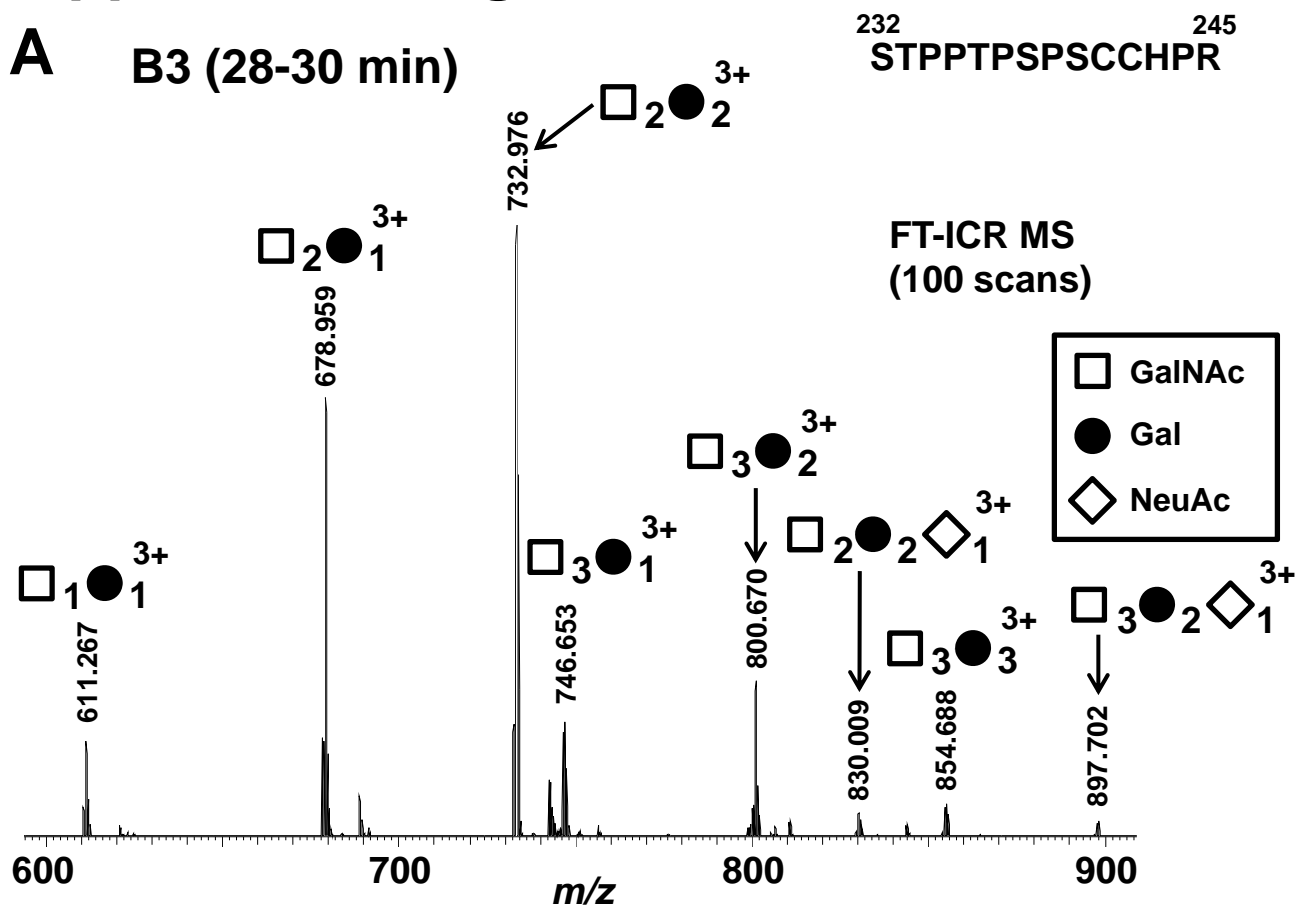

**B** B4 (30-32 min)

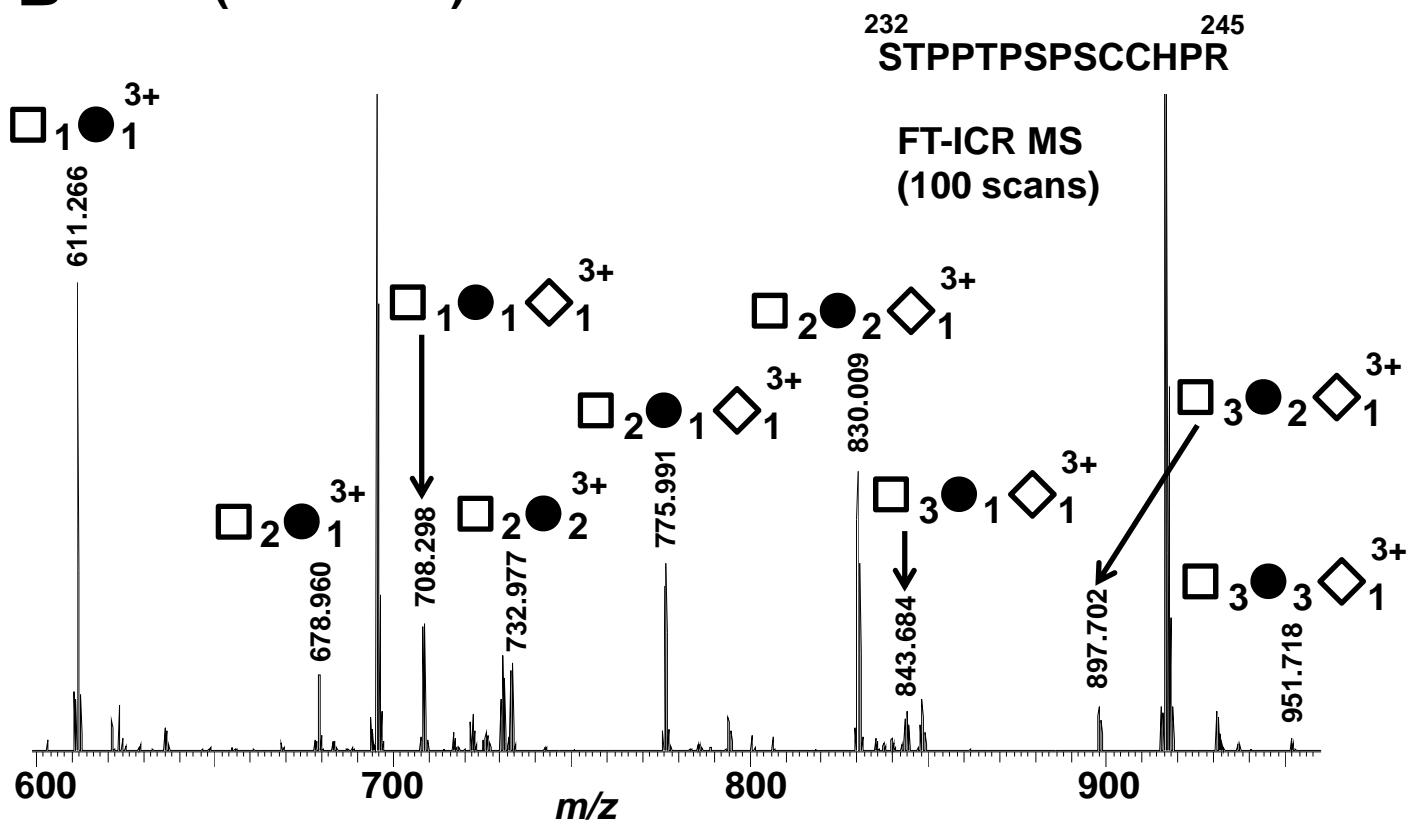

Supplemental Fig. 2. The NanoMate™ ESI FT-ICR mass spectrum of IgA1 (Mce1) myeloma protein HR Ser<sup>232</sup>-Arg<sup>245</sup> glycopeptides, fractionated into the wells B3 (28-30 min) (A) and B4 (30-32 min) (B) by offline LC revealed the same series of HR *O*-glycopeptides seen for the *O*-glycopeptides in Fig. 1B. Monosialylated glycopeptides were detected in spite of neuraminidase treatment. All glycopeptides were detected as triply charged ions. Each spectrum represents the sum of 100 individual FT-ICR MS scans.

# Supplemental Fig. 3

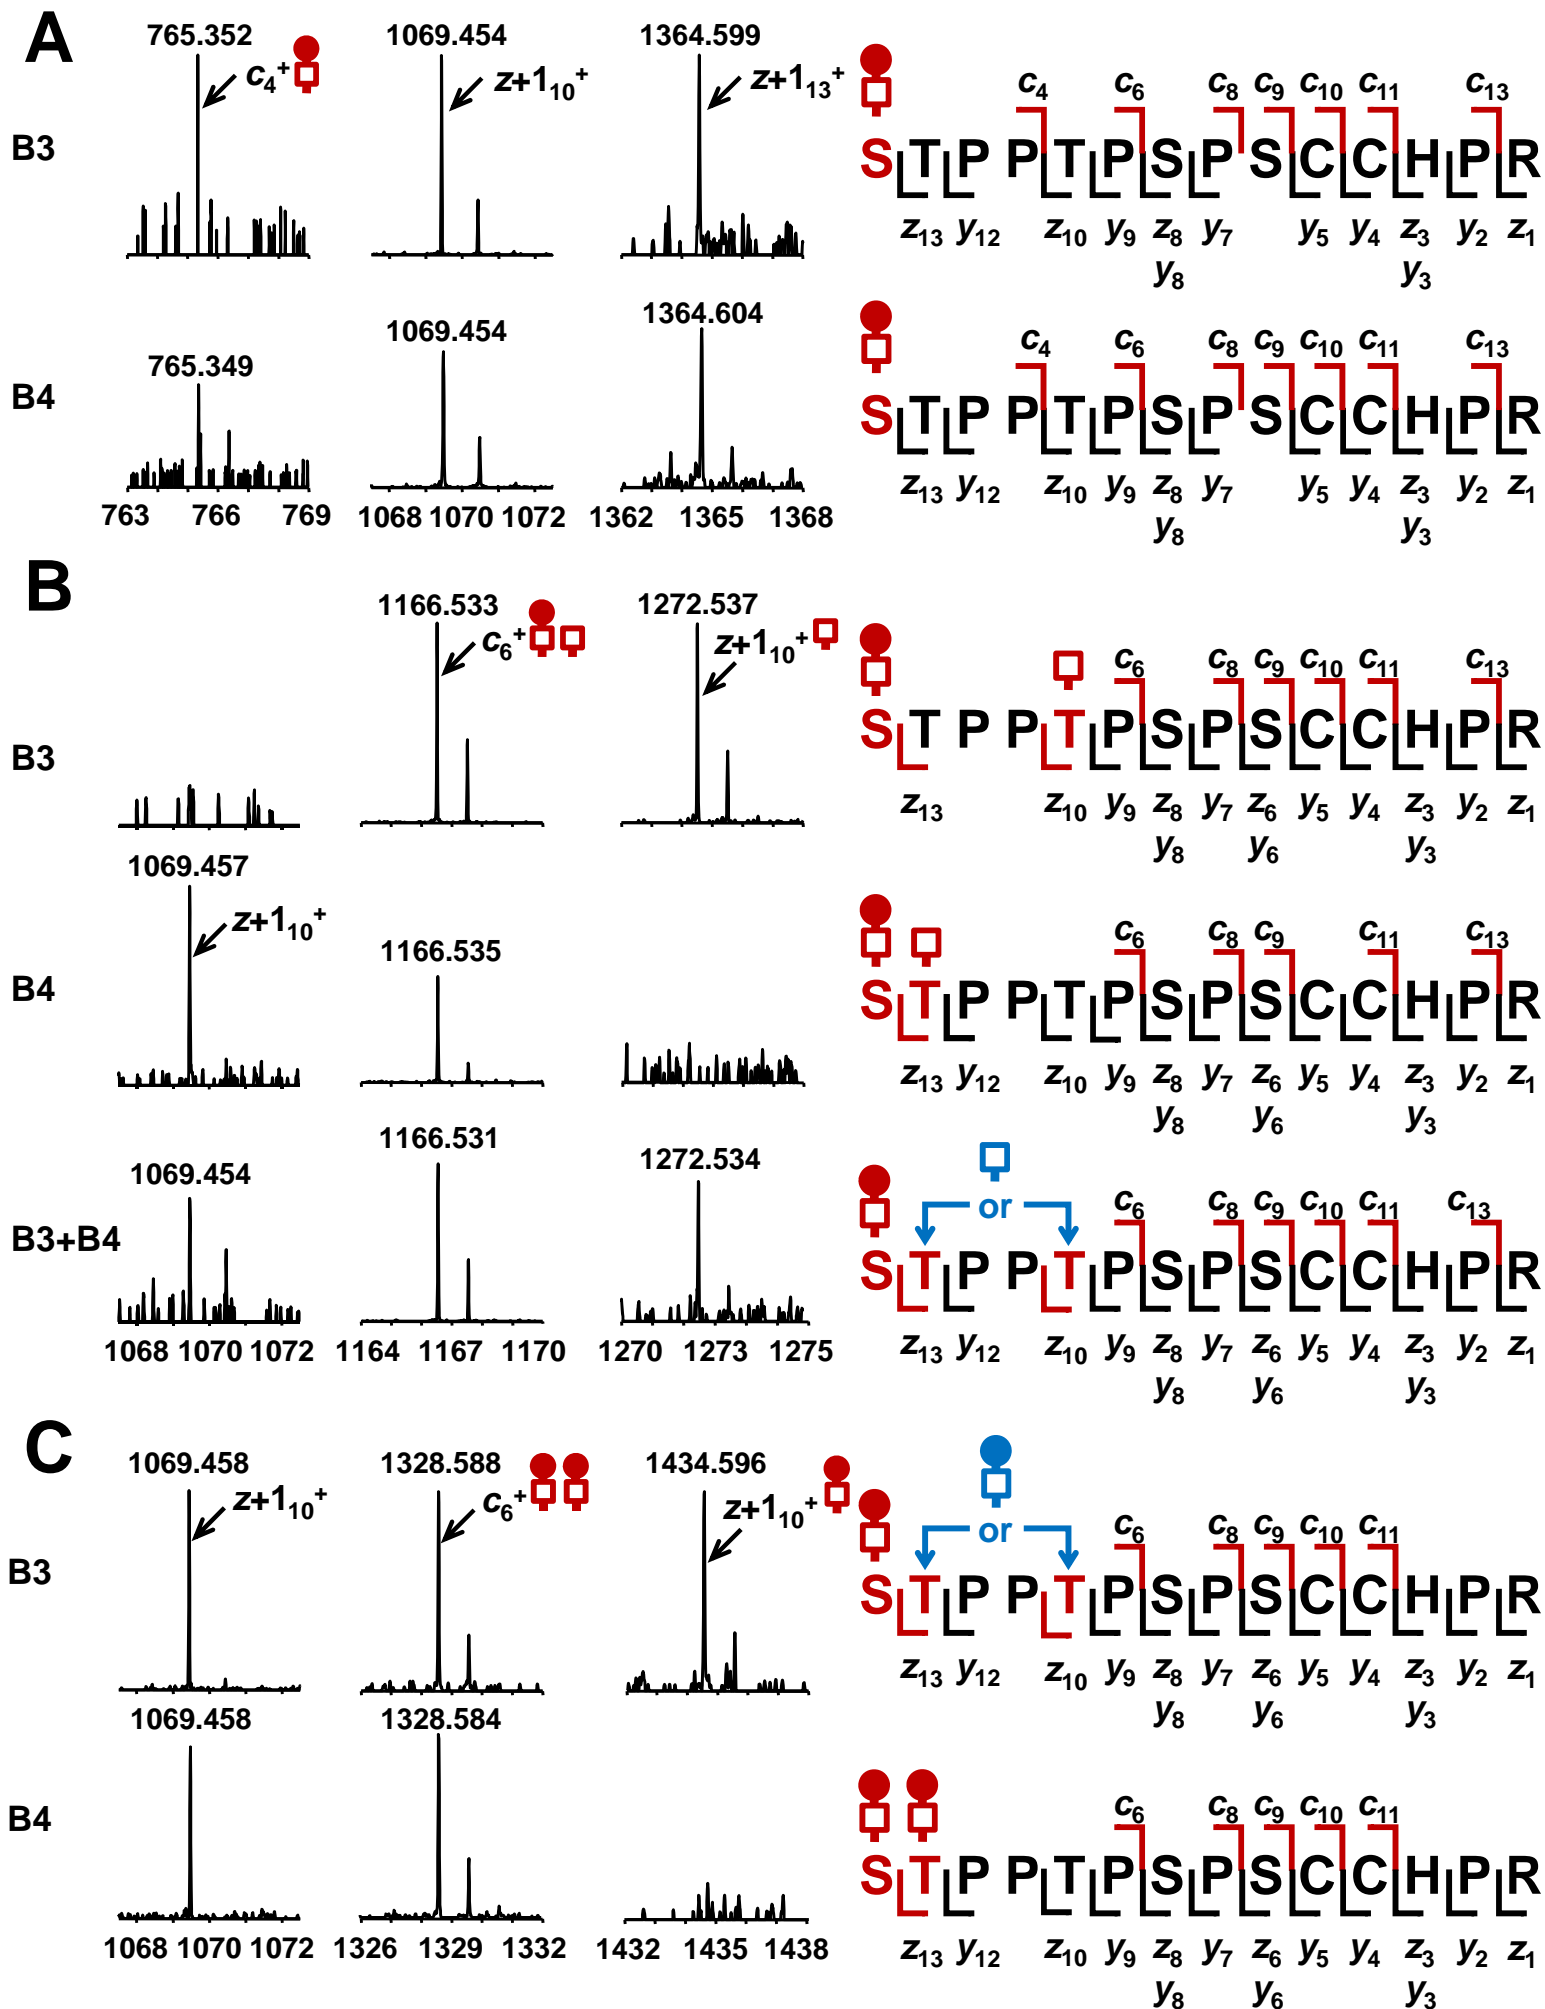

Supplemental Fig. 3. AI-ECD FT-ICR tandem MS of the IgA1 HR Ser<sup>232</sup>-Arg<sup>245</sup> with GalNAc<sub>1</sub>Gal<sub>1</sub> (A), GalNAc<sub>2</sub>Gal<sub>1</sub> (B), and GalNAc<sub>2</sub>Gal<sub>2</sub> (C). Each AI-ECD fragmentation was performed using a triply charged precursor ion and 100 individual FT-ICR tandem MS scans were collected for each spectrum. Arrows in the spectra denote the key fragments that allowed assignment of glycan attachment sites and identification of amino acid positional isomers. The observed *c*, *z*, and *y* fragments for each *O*-glycopeptide are indicated above and below the sequences. Arrows in the amino-acid sequence point the alternative attachment sites in the isomeric structural variants of glycopeptides (panels B, C).

# Supplemental Fig. 4

## A. C-terminal (Ser<sup>232</sup>-Arg<sup>245</sup>) HR

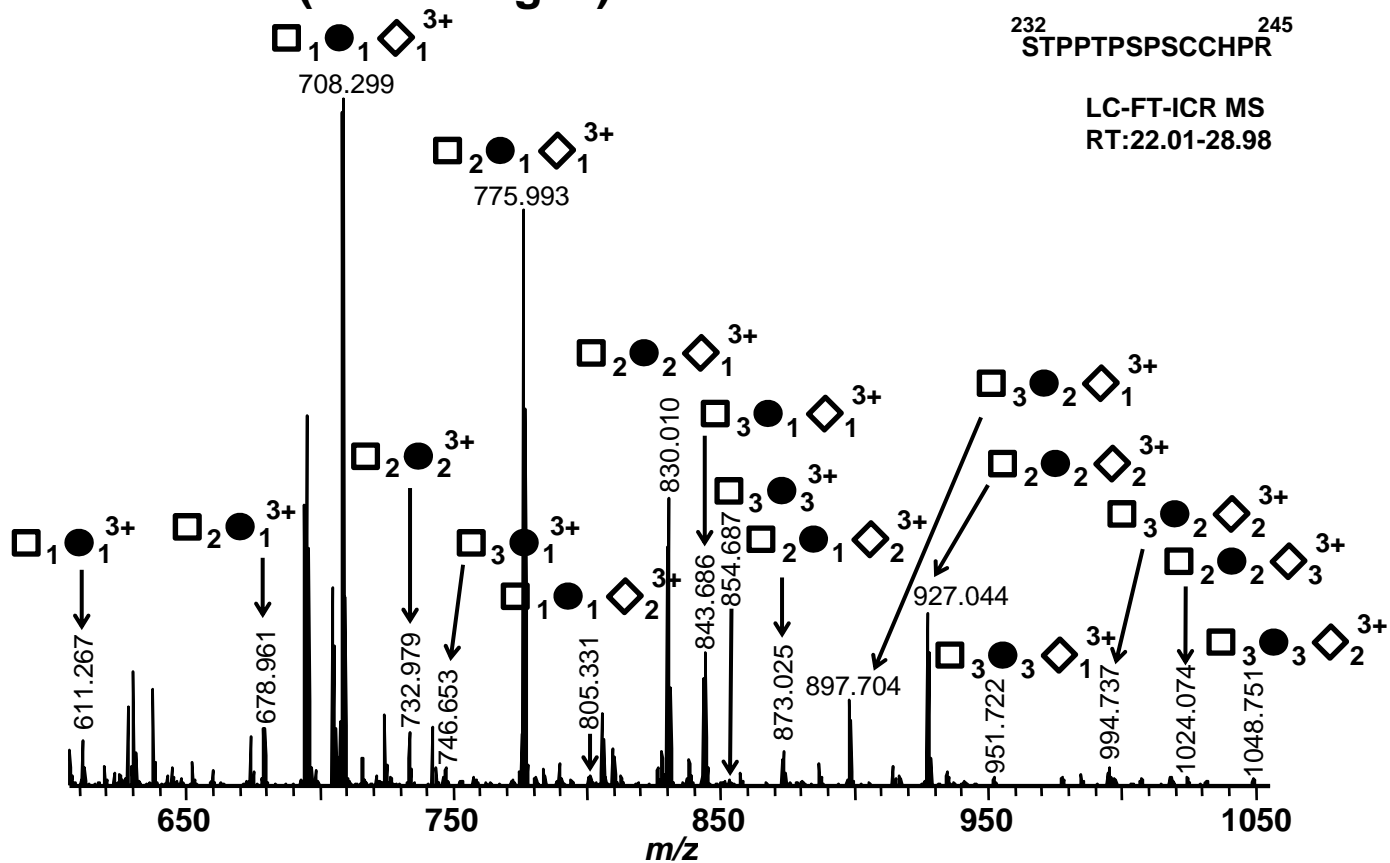

## B. N-terminal (His<sup>208</sup>-Pro<sup>231</sup>) HR

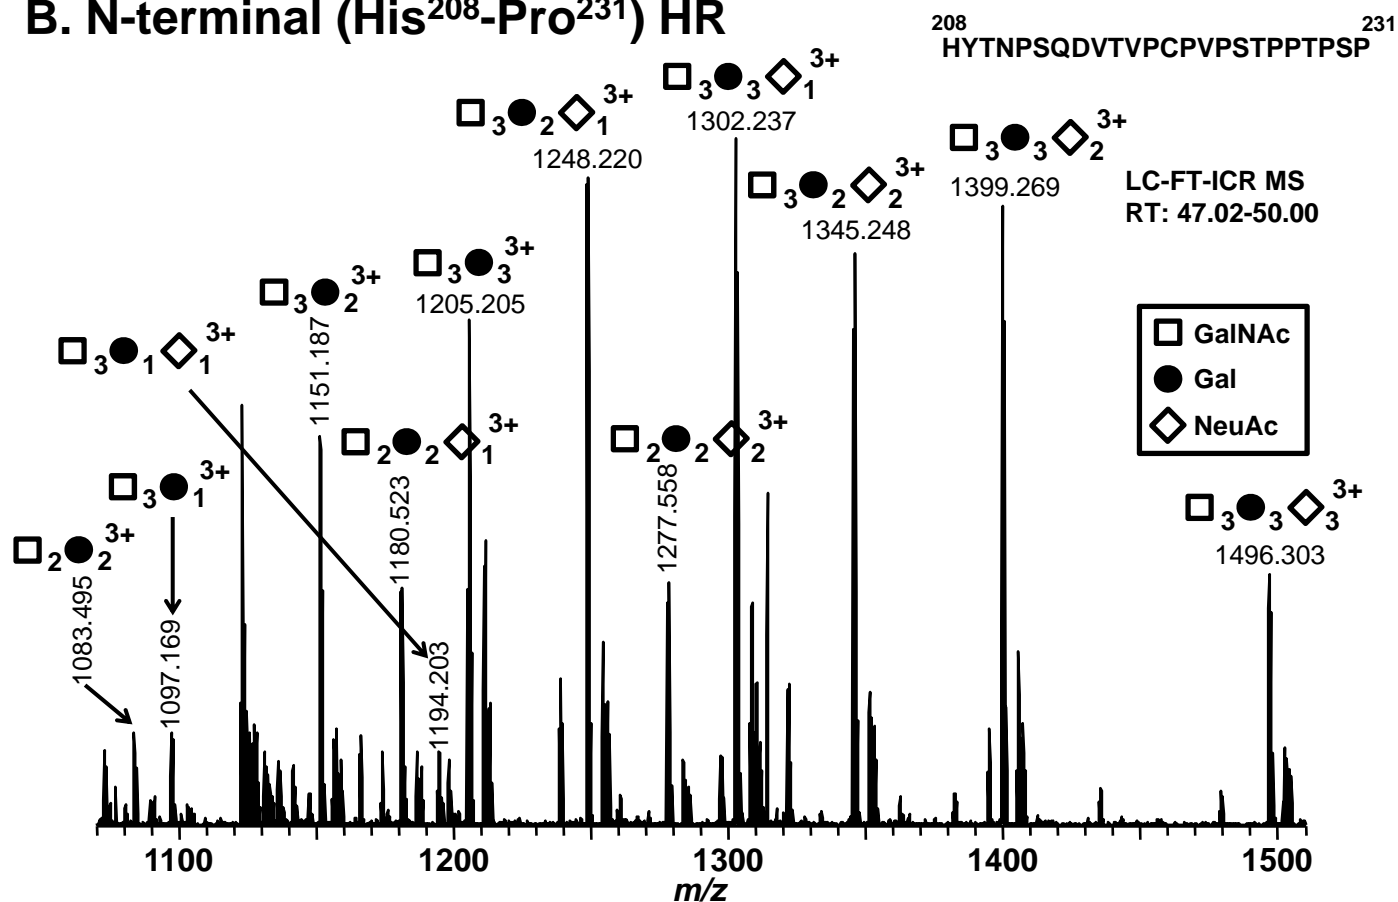

Supplemental Fig. 4. Online LC FT-ICR MS analysis of Ser<sup>232</sup>-Arg<sup>245</sup> (A) and His<sup>208</sup>-Pro<sup>231</sup> (B) HR glycopeptides of normal human IgA1. All glycopeptides were detected as triply charged ions. The number of *O*-glycan chains was assigned based on the masses of the amino-acid sequence, GalNAc (open squares), Gal (full circles), and NeuAc (open diamonds). The *m/z* values for the observed glycopeptides, their respective retention times, relative abundance, and mass error are summarized in Table 2 and Supplemental Table 4.



# Supplemental Fig. 5

## A S232-R245 + $\square_2 \bullet_1 \diamond_1$

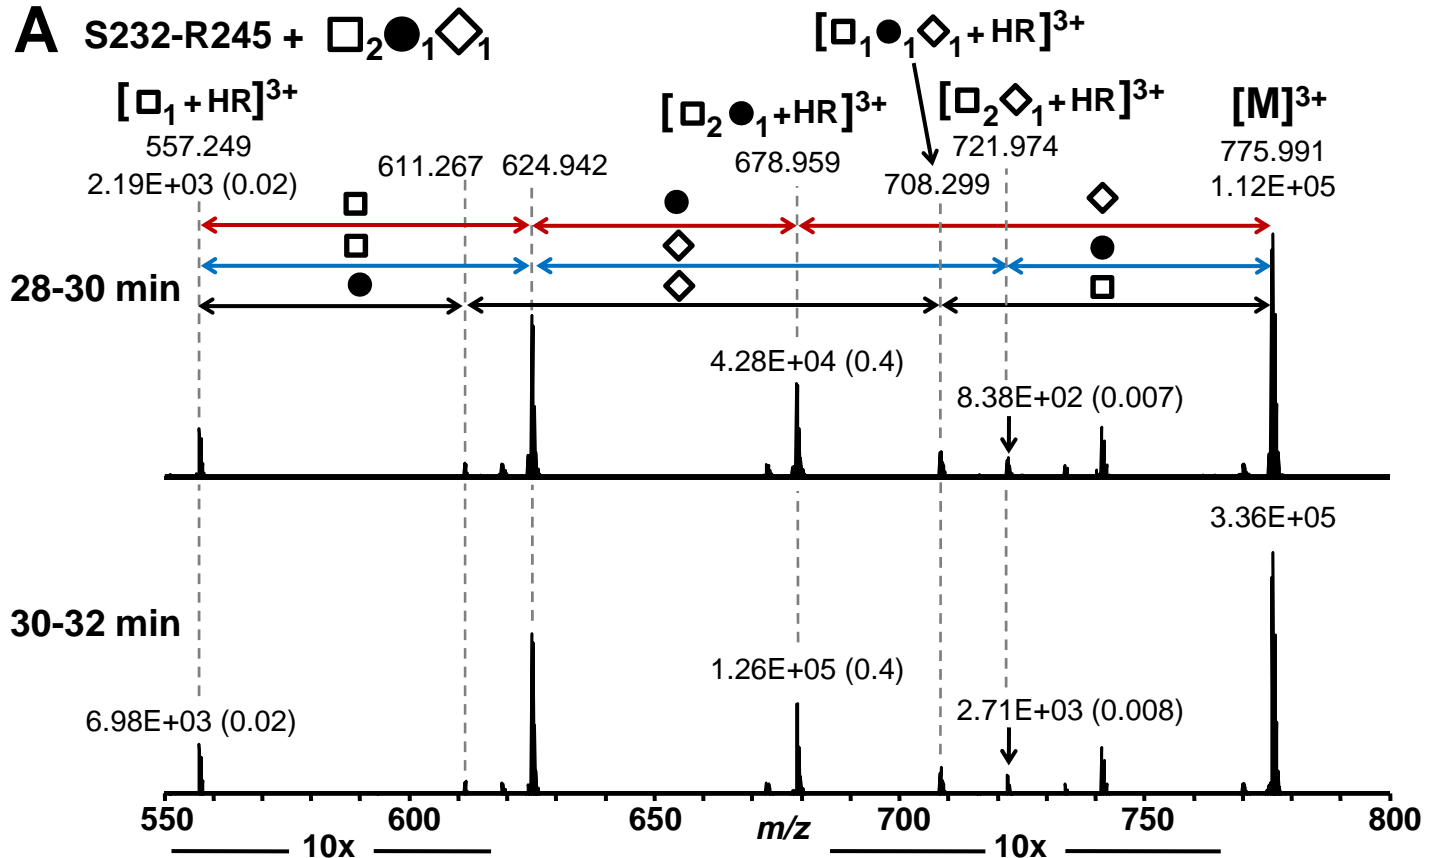

## B S232-R245 + $\square_2 \bullet_2 \diamond_1$

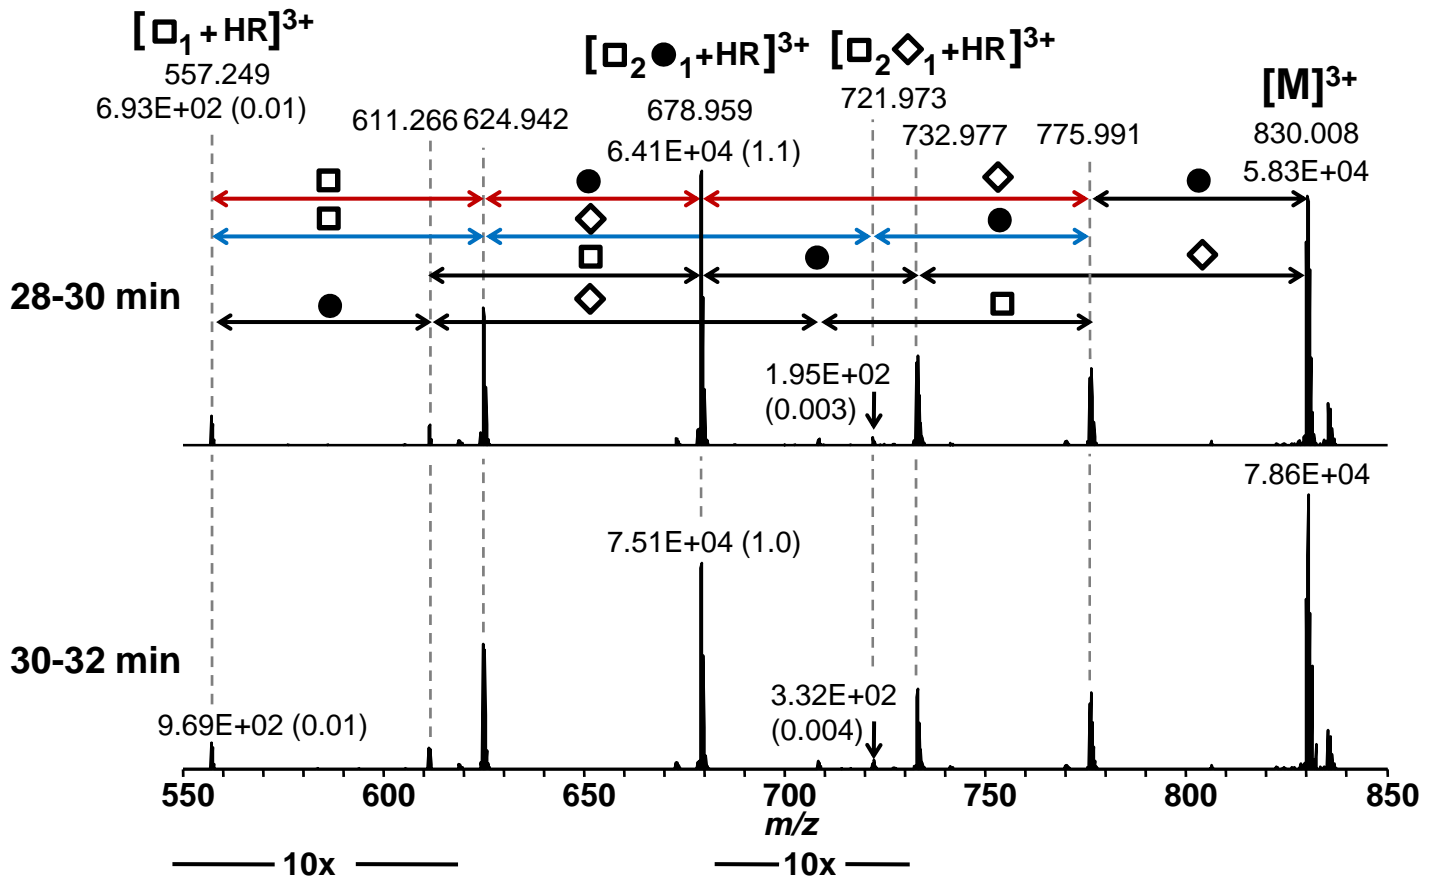

Supplemental Fig. 5. IRMPD FT-ICR tandem MS of the normal human serum IgA1 HR Ser<sup>232</sup>-Arg<sup>245</sup> with GalNAc<sub>2</sub>Gal<sub>1</sub>NeuAc<sub>1</sub> (A) and GalNAc<sub>2</sub>Gal<sub>2</sub>NeuAc<sub>1</sub> (B) fractionated into 28-30 min and 30-32 min fractions by off-line RP LC. Red fragmentation pathway indicates NeuAc (open diamond) attachment to Gal (filled circle), whereas blue fragmentation pathway shows GalNAc (open rectangle) with NeuAc.

# Supplemental MS spectra

## IgA1 (Mce1) myeloma protein

Ser<sup>232</sup>-Arg<sup>245</sup> + GalNAc<sub>1</sub>Gal<sub>1</sub>

AI-ECD FT-ICR MS/MS  
(100 scans)

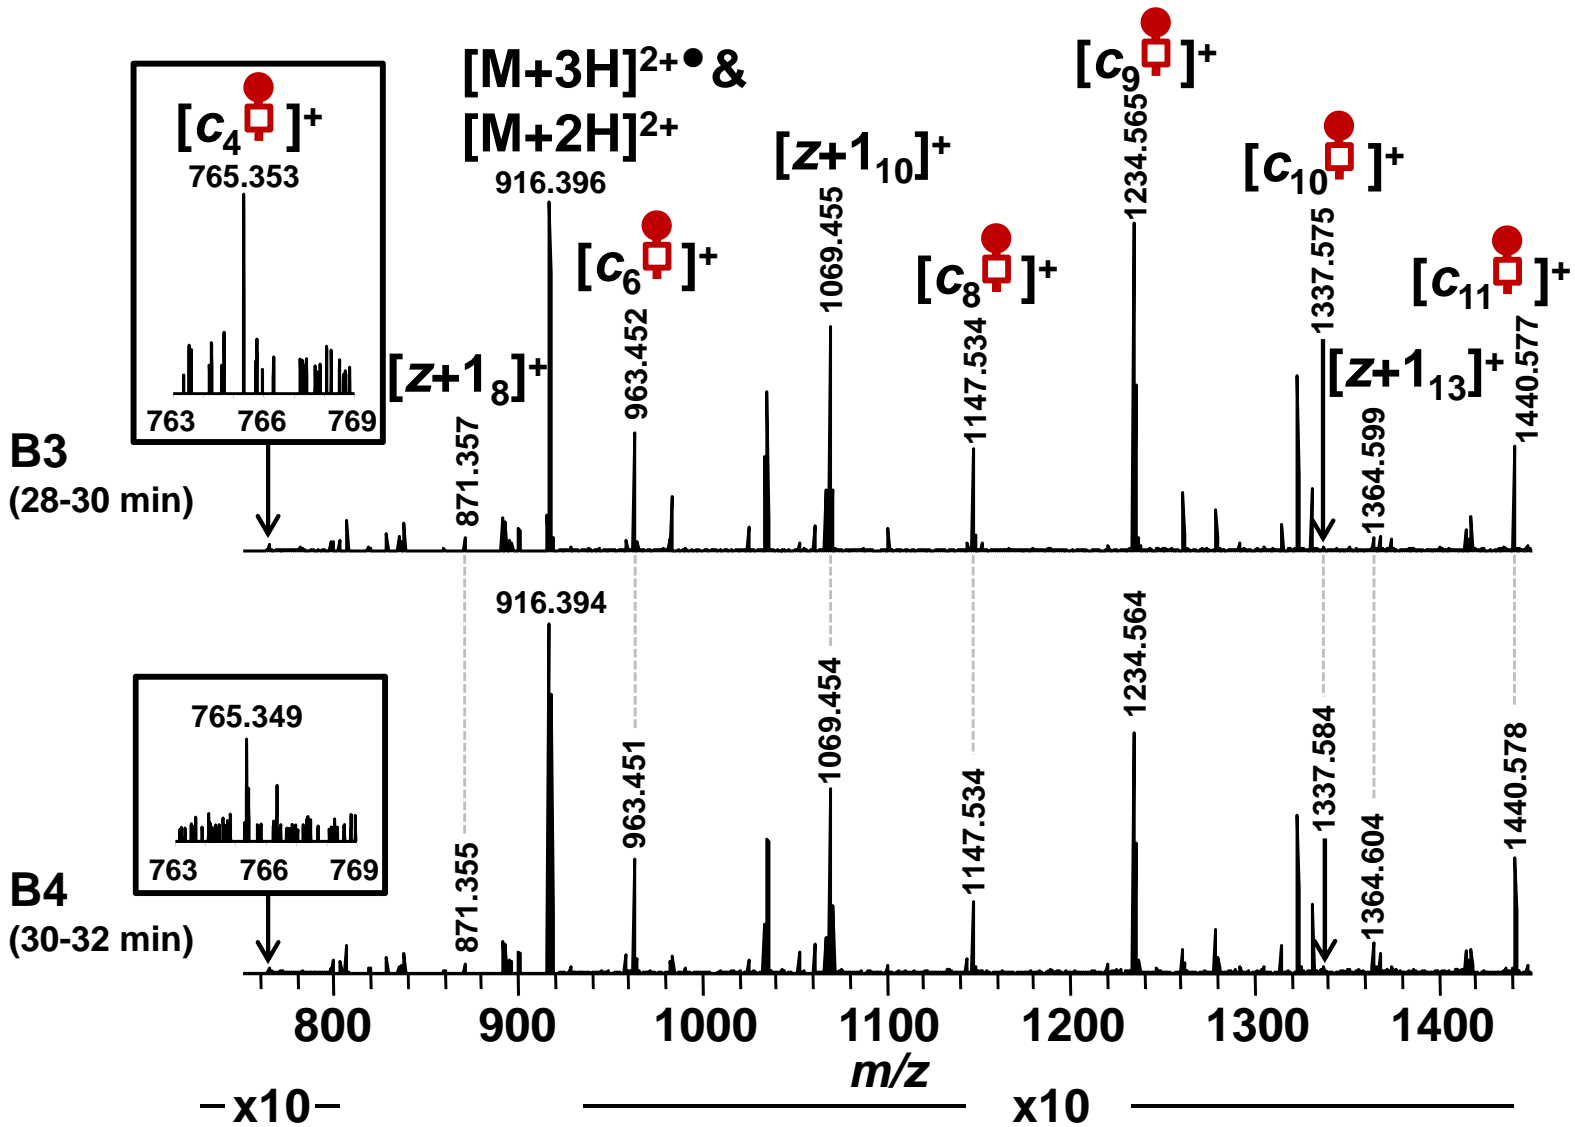

# Ser<sup>232</sup>-Arg<sup>245</sup> + GalNAc<sub>1</sub>Gal<sub>1</sub>

## B3 (28-30 min)

| <i>m/z</i> | Charge | Theoretical MW | Assignment                | Mass error |
|------------|--------|----------------|---------------------------|------------|
| 765.353    | 1      | 765.351        | C <sub>4</sub> + □ 1 ● 1  | 2.22       |
| 871.357    | 1      | 871.354        | Z+1 <sub>8</sub>          | 3.01       |
| 916.396    | 2      | 1831.784       | M                         | 0.56       |
| 963.452    | 1      | 963.452        | C <sub>6</sub> + □ 1 ● 1  | 0.31       |
| 1069.455   | 1      | 1069.455       | Z+1 <sub>10</sub>         | 0.21       |
| 1147.534   | 1      | 1147.537       | C <sub>8</sub> + □ 1 ● 1  | -2.18      |
| 1234.565   | 1      | 1234.569       | C <sub>9</sub> + □ 1 ● 1  | -2.83      |
| 1337.575   | 1      | 1337.578       | C <sub>10</sub> + □ 1 ● 1 | -2.02      |
| 1364.599   | 1      | 1364.608       | Z+1 <sub>13</sub>         | -6.58      |
| 1440.577   | 1      | 1440.587       | C <sub>11</sub> + □ 1 ● 1 | -6.59      |

## B4 (30-32 min)

| <i>m/z</i> | Charge | Theoretical MW | Assignment                | Mass error |
|------------|--------|----------------|---------------------------|------------|
| 765.349    | 1      | 765.351        | C <sub>4</sub> + □ 1 ● 1  | -2.48      |
| 871.355    | 1      | 871.354        | Z+1 <sub>8</sub>          | 0.71       |
| 916.394    | 2      | 1831.784       | M                         | -1.63      |
| 963.451    | 1      | 963.452        | C <sub>6</sub> + □ 1 ● 1  | -0.73      |
| 1069.454   | 1      | 1069.455       | Z+1 <sub>10</sub>         | -0.73      |
| 1147.534   | 1      | 1147.537       | C <sub>8</sub> + □ 1 ● 1  | -2.18      |
| 1234.564   | 1      | 1234.569       | C <sub>9</sub> + □ 1 ● 1  | -3.64      |
| 1337.584   | 1      | 1337.578       | C <sub>10</sub> + □ 1 ● 1 | 4.71       |
| 1364.604   | 1      | 1364.608       | Z+1 <sub>13</sub>         | -2.92      |
| 1440.578   | 1      | 1440.587       | C <sub>11</sub> + □ 1 ● 1 | -5.90      |

# IgA1 (Mce1) myeloma protein

Ser<sup>232</sup>-Arg<sup>245</sup> + GaINAc<sub>2</sub>Gal<sub>1</sub>

AI-ECD FT-ICR MS/MS  
(100 scans)

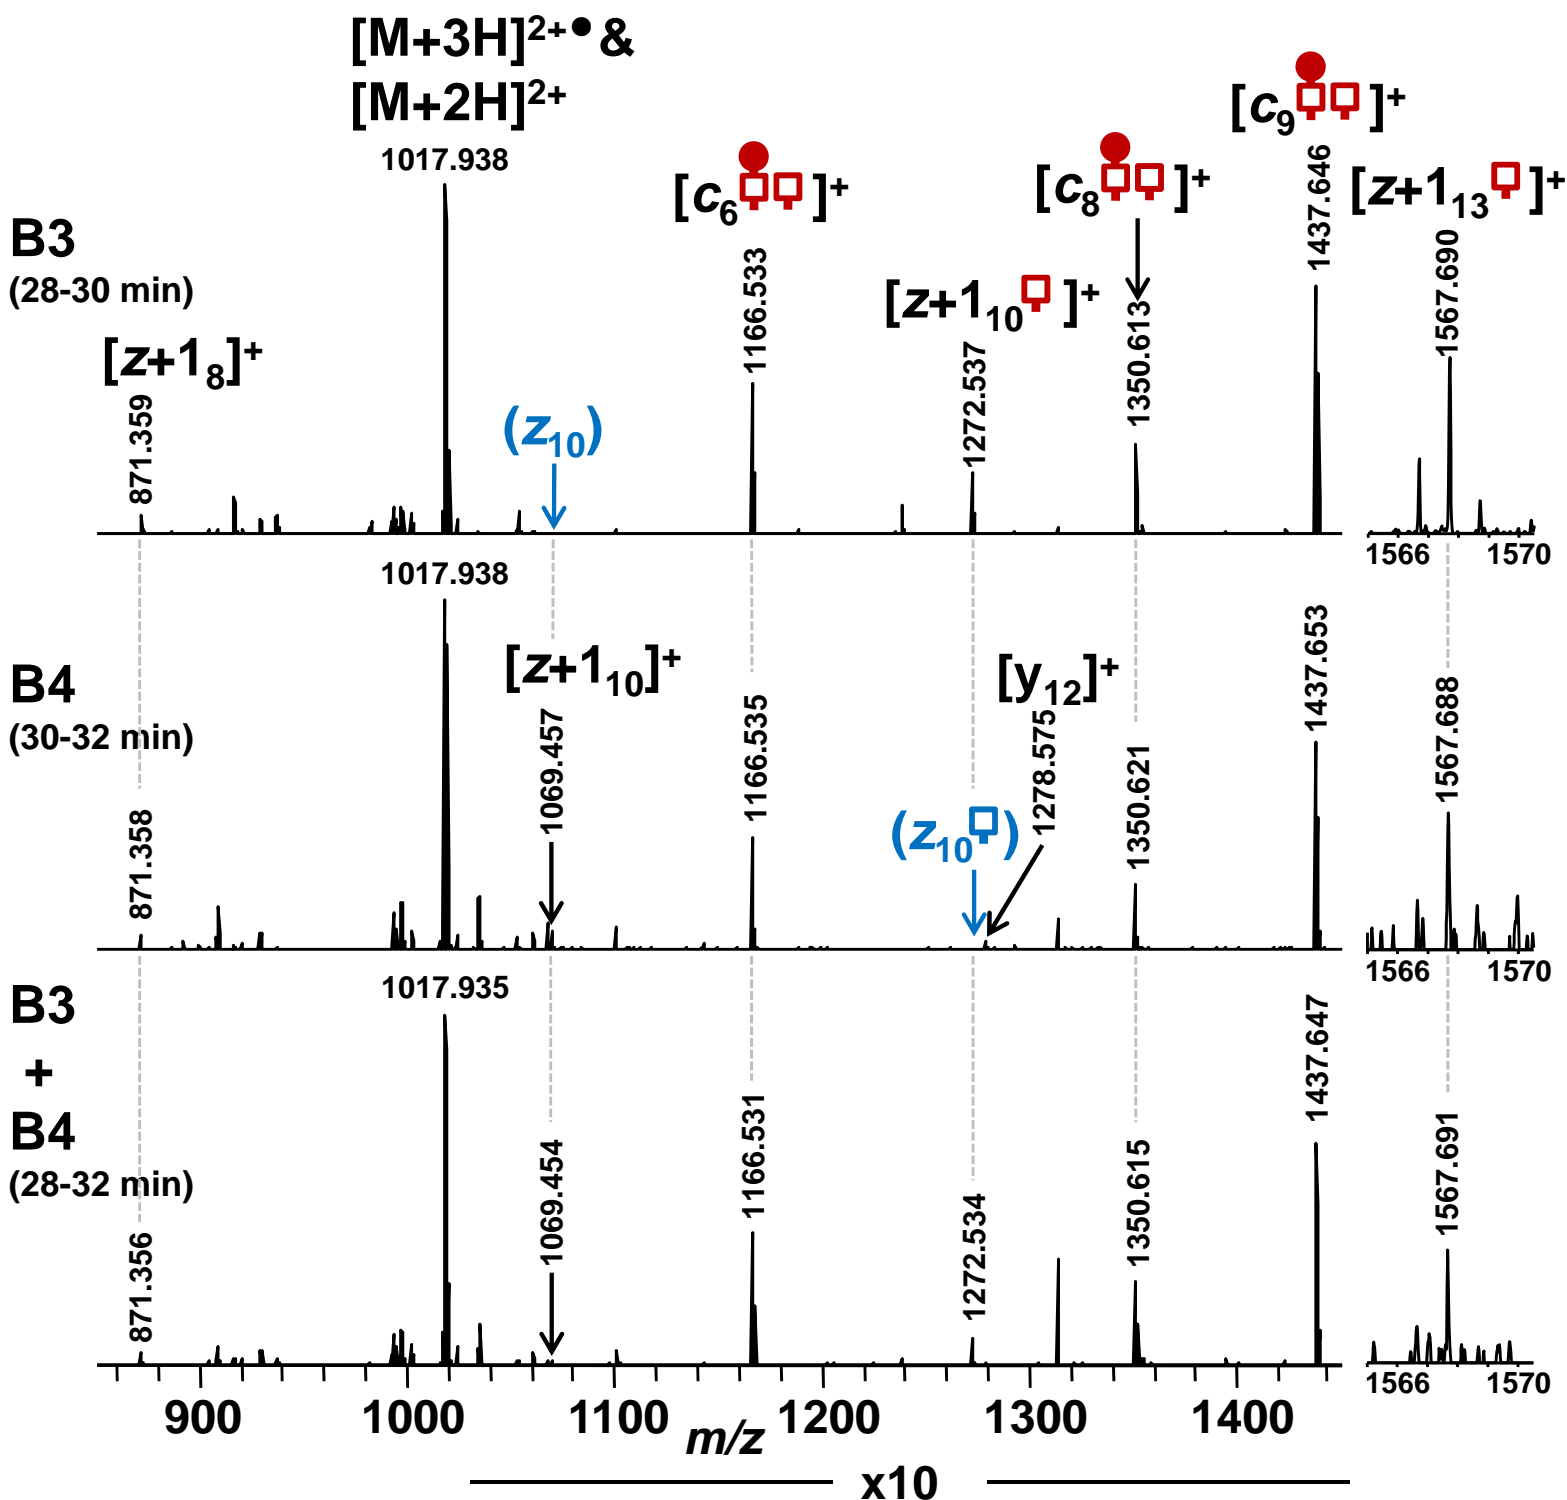

# Ser<sup>232</sup>-Arg<sup>245</sup> + GalNAc<sub>2</sub>Gal<sub>1</sub>

## B3 (28-30 min)

| <i>m/z</i> | Charge | Theoretical MW | Assignment                                                                     | Mass error |
|------------|--------|----------------|--------------------------------------------------------------------------------|------------|
| 871.359    | 1      | 871.354        | z+1 <sub>8</sub>                                                               | 5.30       |
| 1017.938   | 2      | 2034.863       | M                                                                              | 2.76       |
| 1166.533   | 1      | 1166.531       | C <sub>6</sub> + <input type="checkbox"/> 2 <input checked="" type="radio"/> 1 | 1.63       |
| 1272.537   | 1      | 1272.534       | z+1 <sub>10</sub> + <input type="checkbox"/> 1                                 | 2.22       |
| 1350.613   | 1      | 1350.616       | C <sub>8</sub> + <input type="checkbox"/> 2 <input checked="" type="radio"/> 1 | -2.15      |
| 1437.646   | 1      | 1437.648       | C <sub>9</sub> + <input type="checkbox"/> 2 <input checked="" type="radio"/> 1 | -1.32      |
| 1567.69    | 1      | 1567.687       | z+1 <sub>13</sub> + <input type="checkbox"/> 1                                 | 1.67       |

## B4 (30-32 min)

| <i>m/z</i> | Charge | Theoretical MW | Assignment                                                                     | Mass error |
|------------|--------|----------------|--------------------------------------------------------------------------------|------------|
| 871.358    | 1      | 871.354        | z+1 <sub>8</sub>                                                               | 4.15       |
| 1017.938   | 2      | 2034.863       | M                                                                              | 2.76       |
| 1069.457   | 1      | 1069.455       | z+1 <sub>10</sub>                                                              | 2.08       |
| 1166.535   | 1      | 1166.531       | C <sub>6</sub> + <input type="checkbox"/> 2 <input checked="" type="radio"/> 1 | 3.34       |
| 1278.575   | 1      | 1278.572       | y <sub>12</sub>                                                                | 2.50       |
| 1350.621   | 1      | 1350.616       | C <sub>8</sub> + <input type="checkbox"/> 2 <input checked="" type="radio"/> 1 | 3.78       |
| 1437.653   | 1      | 1437.648       | C <sub>9</sub> + <input type="checkbox"/> 2 <input checked="" type="radio"/> 1 | 3.55       |
| 1567.688   | 1      | 1567.687       | z+1 <sub>13</sub> + <input type="checkbox"/> 1                                 | 0.40       |

## B3 + B4 (28-32 min)

| <i>m/z</i> | Charge | Theoretical MW | Assignment                                                                     | Mass error |
|------------|--------|----------------|--------------------------------------------------------------------------------|------------|
| 871.356    | 1      | 871.354        | z+1 <sub>8</sub>                                                               | 1.86       |
| 1017.935   | 2      | 2034.863       | M                                                                              | -0.19      |
| 1069.454   | 1      | 1069.455       | z+1 <sub>10</sub>                                                              | -0.73      |
| 1166.531   | 1      | 1166.531       | C <sub>6</sub> + <input type="checkbox"/> 2 <input checked="" type="radio"/> 1 | -0.09      |
| 1272.534   | 1      | 1272.534       | z+1 <sub>10</sub> + <input type="checkbox"/> 1                                 | -0.14      |
| 1350.615   | 1      | 1350.616       | C <sub>8</sub> + <input type="checkbox"/> 2 <input checked="" type="radio"/> 1 | -0.67      |
| 1437.647   | 1      | 1437.648       | C <sub>9</sub> + <input type="checkbox"/> 2 <input checked="" type="radio"/> 1 | -0.63      |
| 1567.691   | 1      | 1567.687       | z+1 <sub>13</sub> + <input type="checkbox"/> 1                                 | 2.31       |



# Ser<sup>232</sup>-Arg<sup>245</sup> + GalNAc<sub>2</sub>Gal<sub>2</sub>

## B3 (28-30 min)

| <i>m/z</i> | Charge | Theoretical MW | Assignment                                                                           | Mass error |
|------------|--------|----------------|--------------------------------------------------------------------------------------|------------|
| 871.358    | 1      | 871.354        | z+1 <sub>8</sub>                                                                     | 4.15       |
| 1069.458   | 1      | 1069.455       | z+1 <sub>10</sub>                                                                    | 3.01       |
| 1098.967   | 2      | 2196.916       | M                                                                                    | 4.93       |
| 1328.588   | 1      | 1328.584       | C <sub>6</sub> + <input type="checkbox"/> 2 <input checked="" type="checkbox"/> 2    | 3.09       |
| 1434.596   | 1      | 1434.587       | z+1 <sub>10</sub> + <input type="checkbox"/> 1 <input checked="" type="checkbox"/> 1 | 5.94       |
| 1512.673   | 1      | 1512.669       | C <sub>8</sub> + <input type="checkbox"/> 2 <input checked="" type="checkbox"/> 2    | 2.84       |
| 1599.709   | 1      | 1599.701       | C <sub>9</sub> + <input type="checkbox"/> 2 <input checked="" type="checkbox"/> 2    | 5.19       |

## B4 (30-32 min)

| <i>m/z</i> | Charge | Theoretical MW | Assignment                                                                        | Mass error |
|------------|--------|----------------|-----------------------------------------------------------------------------------|------------|
| 871.357    | 1      | 871.354        | z+1 <sub>8</sub>                                                                  | 3.01       |
| 1069.458   | 1      | 1069.455       | z+1 <sub>10</sub>                                                                 | 3.01       |
| 1098.963   | 2      | 2196.916       | M                                                                                 | 1.28       |
| 1328.584   | 1      | 1328.584       | C <sub>6</sub> + <input type="checkbox"/> 2 <input checked="" type="checkbox"/> 2 | 0.08       |
| 1512.665   | 1      | 1512.669       | C <sub>8</sub> + <input type="checkbox"/> 2 <input checked="" type="checkbox"/> 2 | -2.45      |
| 1599.698   | 1      | 1599.701       | C <sub>9</sub> + <input type="checkbox"/> 2 <input checked="" type="checkbox"/> 2 | -1.69      |



# IgA1 (Mce1) myeloma protein

## A

Ser<sup>232</sup>-Arg<sup>245</sup> + GalNAc<sub>3</sub>Gal<sub>1</sub>

AI-ECD FT-ICR MS/MS  
(100 scans)

EIC

[M+3H]<sup>2+</sup> • &  
[M+2H]<sup>2+</sup> → 1119.475

[746.654]<sup>3+</sup>

B3  
28-30  
min

[z+1]<sub>8</sub><sup>+</sup> [z+1]<sub>13</sub><sup>2+</sup>

871.357 885.888

[c<sub>6</sub>□□□]<sup>+</sup>

[z+1]<sub>10</sub><sup>+</sup>

1272.537 1369.615

[c<sub>9</sub>□□□]<sup>+</sup>

[c<sub>8</sub>□□□]<sup>+</sup>

1553.697

1640.727

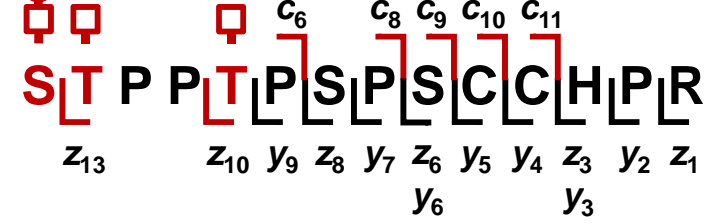

Time (min)

1000 1200 1400 1600  
m/z x10

## B

Ser<sup>232</sup>-Arg<sup>245</sup> + GalNAc<sub>3</sub>Gal<sub>2</sub>

AI-ECD FT-ICR MS/MS  
(100 scans)

EIC

[M+3H]<sup>2+</sup> • &  
[M+2H]<sup>2+</sup> → 1200.503

[800.672]<sup>3+</sup>

B3  
28-30  
min

[z+1]<sub>13</sub><sup>2+</sup>

[z+1]<sub>8</sub><sup>+</sup>

871.357 966.917

[c<sub>4</sub>□□]<sup>+</sup>

1130.490

1129 m/z 1133

[z+1]<sub>10</sub><sup>+</sup>

1272.538

[c<sub>6</sub>□□□]<sup>+</sup>

1531.664

1530 m/z 1534

[c<sub>8</sub>□□□]<sup>+</sup>

1715.752

1714 m/z 1718

[c<sub>9</sub>□□□]<sup>+</sup>

[z+1]<sub>13</sub><sup>+</sup>

1802.782

[c<sub>4</sub>□]<sup>+</sup>

[c<sub>6</sub>□]<sup>+</sup>

[c<sub>8</sub>□]<sup>+</sup>

[c<sub>9</sub>□]<sup>+</sup>

1932.827

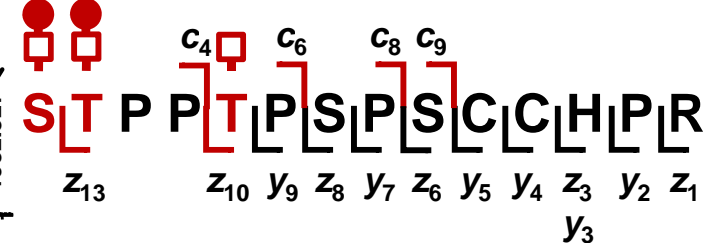

Time (min)

900 1100 1300 1500 1700 1900  
m/z x5

**A**

| <i>m/z</i> | Charge | Theoretical MW | Assignment               | Mass error |
|------------|--------|----------------|--------------------------|------------|
| 871.357    | 1      | 871.354        | z+1 <sub>8</sub>         | 3.01       |
| 885.888    | 2      | 1770.767       | z+1 <sub>13</sub> + □ 2  | 1.10       |
| 1119.475   | 2      | 2237.943       | M                        | 0.10       |
| 1272.537   | 1      | 1272.534       | z+1 <sub>10</sub> + □ 1  | 2.22       |
| 1369.615   | 1      | 1369.611       | c <sub>6</sub> + □ 3 ● 1 | 3.29       |
| 1553.697   | 1      | 1553.695       | c <sub>8</sub> + □ 3 ● 1 | 1.09       |
| 1640.727   | 1      | 1640.727       | c <sub>9</sub> + □ 3 ● 1 | -0.18      |

**B**

| <i>m/z</i> | Charge | Theoretical MW | Assignment                  | Mass error |
|------------|--------|----------------|-----------------------------|------------|
| 871.357    | 1      | 871.354        | z+1 <sub>8</sub>            | 3.01       |
| 966.917    | 2      | 1932.820       | z+1 <sub>13</sub> + □ 2 ● 1 | 3.69       |
| 1130.490   | 1      | 1130.484       | c <sub>4</sub> + □ 2 ● 2    | 5.31       |
| 1200.503   | 2      | 2399.995       | M                           | 1.43       |
| 1272.538   | 1      | 1272.534       | z+1 <sub>10</sub> + □ 1     | 3.00       |
| 1531.664   | 1      | 1531.663       | c <sub>6</sub> + □ 3 ● 2    | 0.46       |
| 1715.752   | 1      | 1715.748       | c <sub>8</sub> + □ 3 ● 2    | 2.27       |
| 1802.782   | 1      | 1802.780       | c <sub>9</sub> + □ 3 ● 2    | 1.05       |
| 1932.827   | 1      | 1932.820       | z+1 <sub>13</sub> + □ 2 ● 1 | 3.68       |

# IgA1 (Mce1) myeloma protein

His<sup>208</sup>-Pro<sup>227</sup> + GalNAc<sub>1</sub>Gal<sub>1</sub>

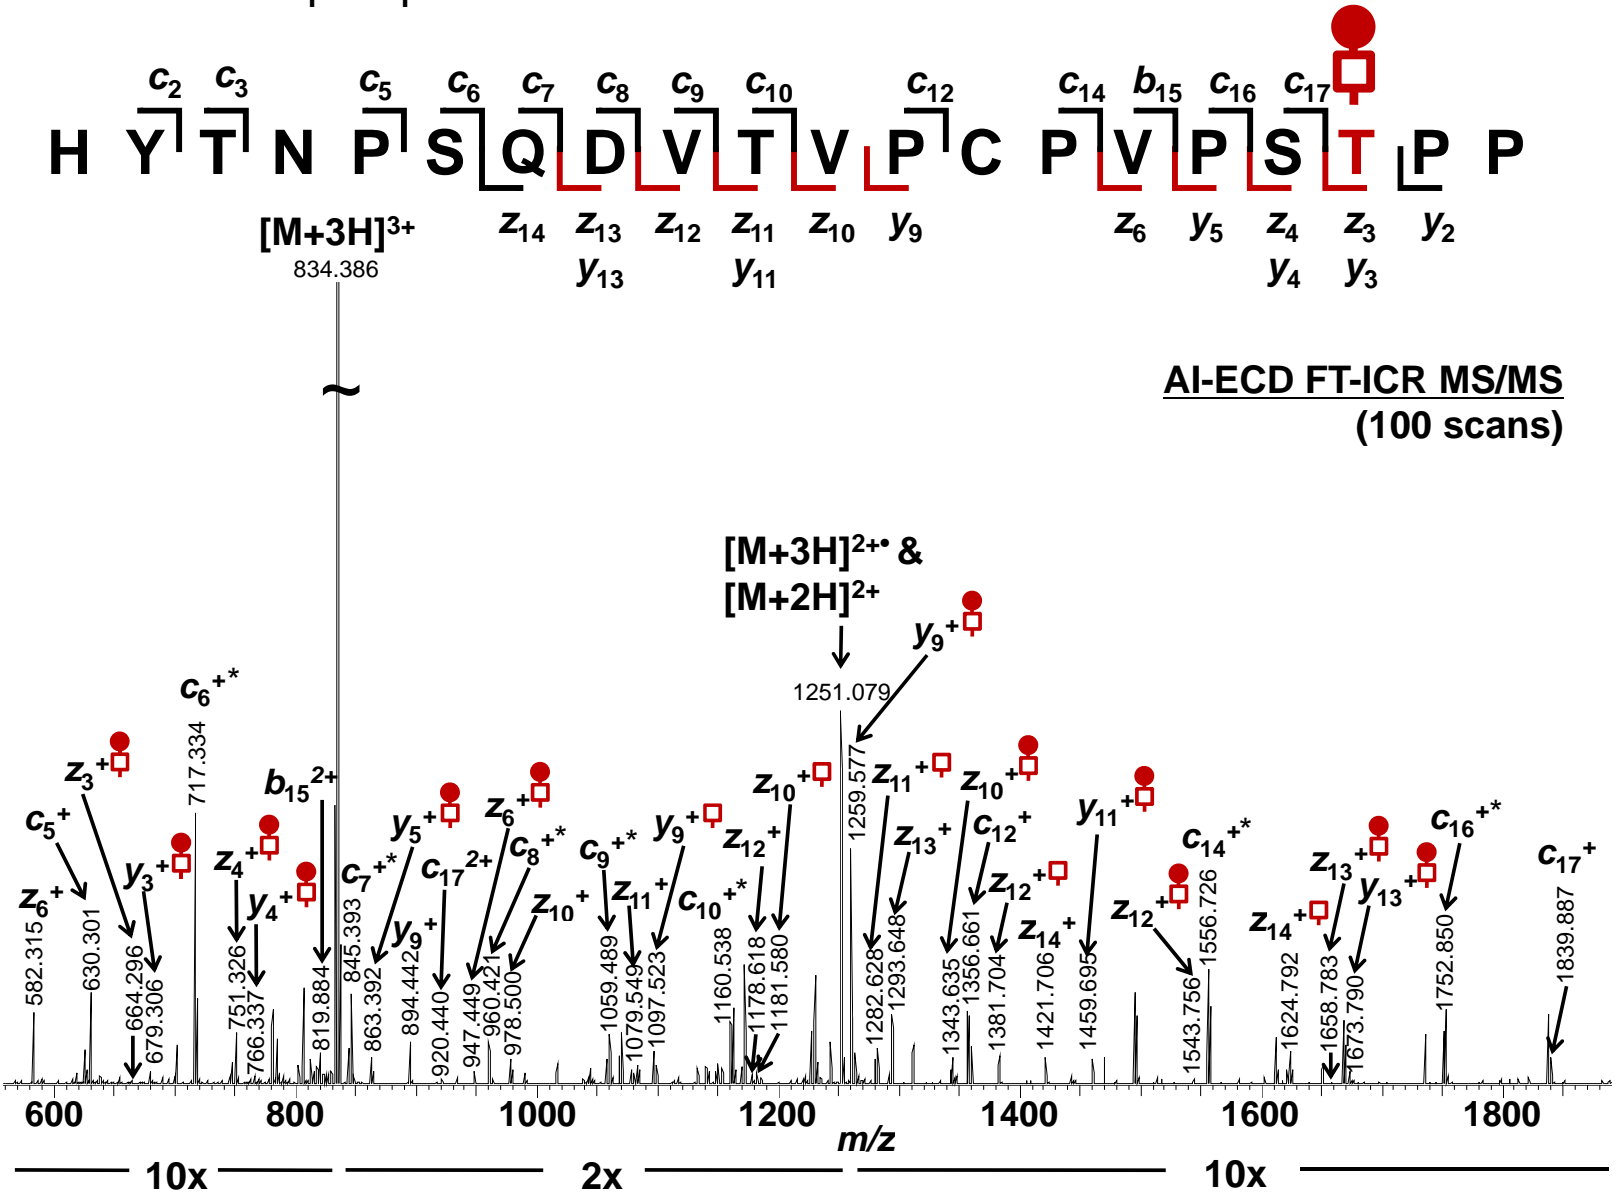

\*Mixture of c and c-1 fragments were observed.

# IgA1 (Mce1) myeloma protein

Thr<sup>228</sup>-Arg<sup>245</sup> + GalNAc<sub>3</sub>Gal<sub>2</sub>

AI-ECD FT-ICR MS/MS  
(100 scans)

**B4**  
30-32 min

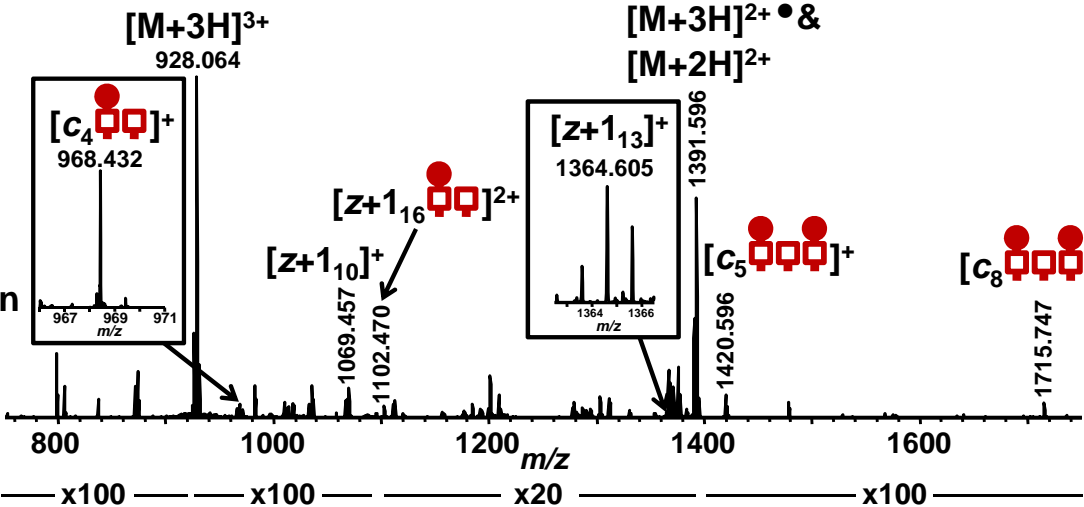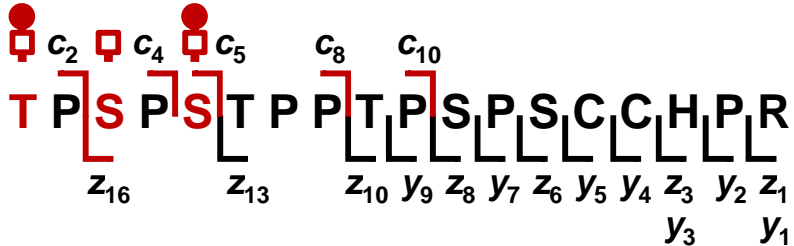

# Thr<sup>228</sup>-Arg<sup>245</sup> + GalNAc<sub>3</sub>Gal<sub>2</sub>

B4 (30-32 min)

| <i>m/z</i> | Charge | Theoretical MW | Assignment        |   |         | Mass error |
|------------|--------|----------------|-------------------|---|---------|------------|
| 968.432    | 1      | 968.431        | C <sub>4</sub>    | + | □ 2 ● 1 | 1.34       |
| 928.064    | 3      | 2782.181       | M                 |   |         | -1.10      |
| 1069.457   | 1      | 1069.455       | Z+1 <sub>10</sub> |   |         | 2.08       |
| 1102.470   | 2      | 2203.936       | Z+1 <sub>16</sub> | + | □ 2 ● 1 | -1.71      |
| 1364.605   | 1      | 1364.608       | Z+1 <sub>13</sub> |   |         | -2.18      |
| 1391.596   | 2      | 2782.181       | M                 |   |         | 1.52       |
| 1420.596   | 1      | 1420.595       | C <sub>5</sub>    | + | □ 3 ● 2 | 0.77       |
| 1715.747   | 1      | 1715.748       | C <sub>8</sub>    | + | □ 3 ● 2 | -0.64      |

# IgA1 (Mce1) myeloma protein

Thr<sup>228</sup>-Arg<sup>245</sup> + GalNAc<sub>3</sub>Gal<sub>3</sub>

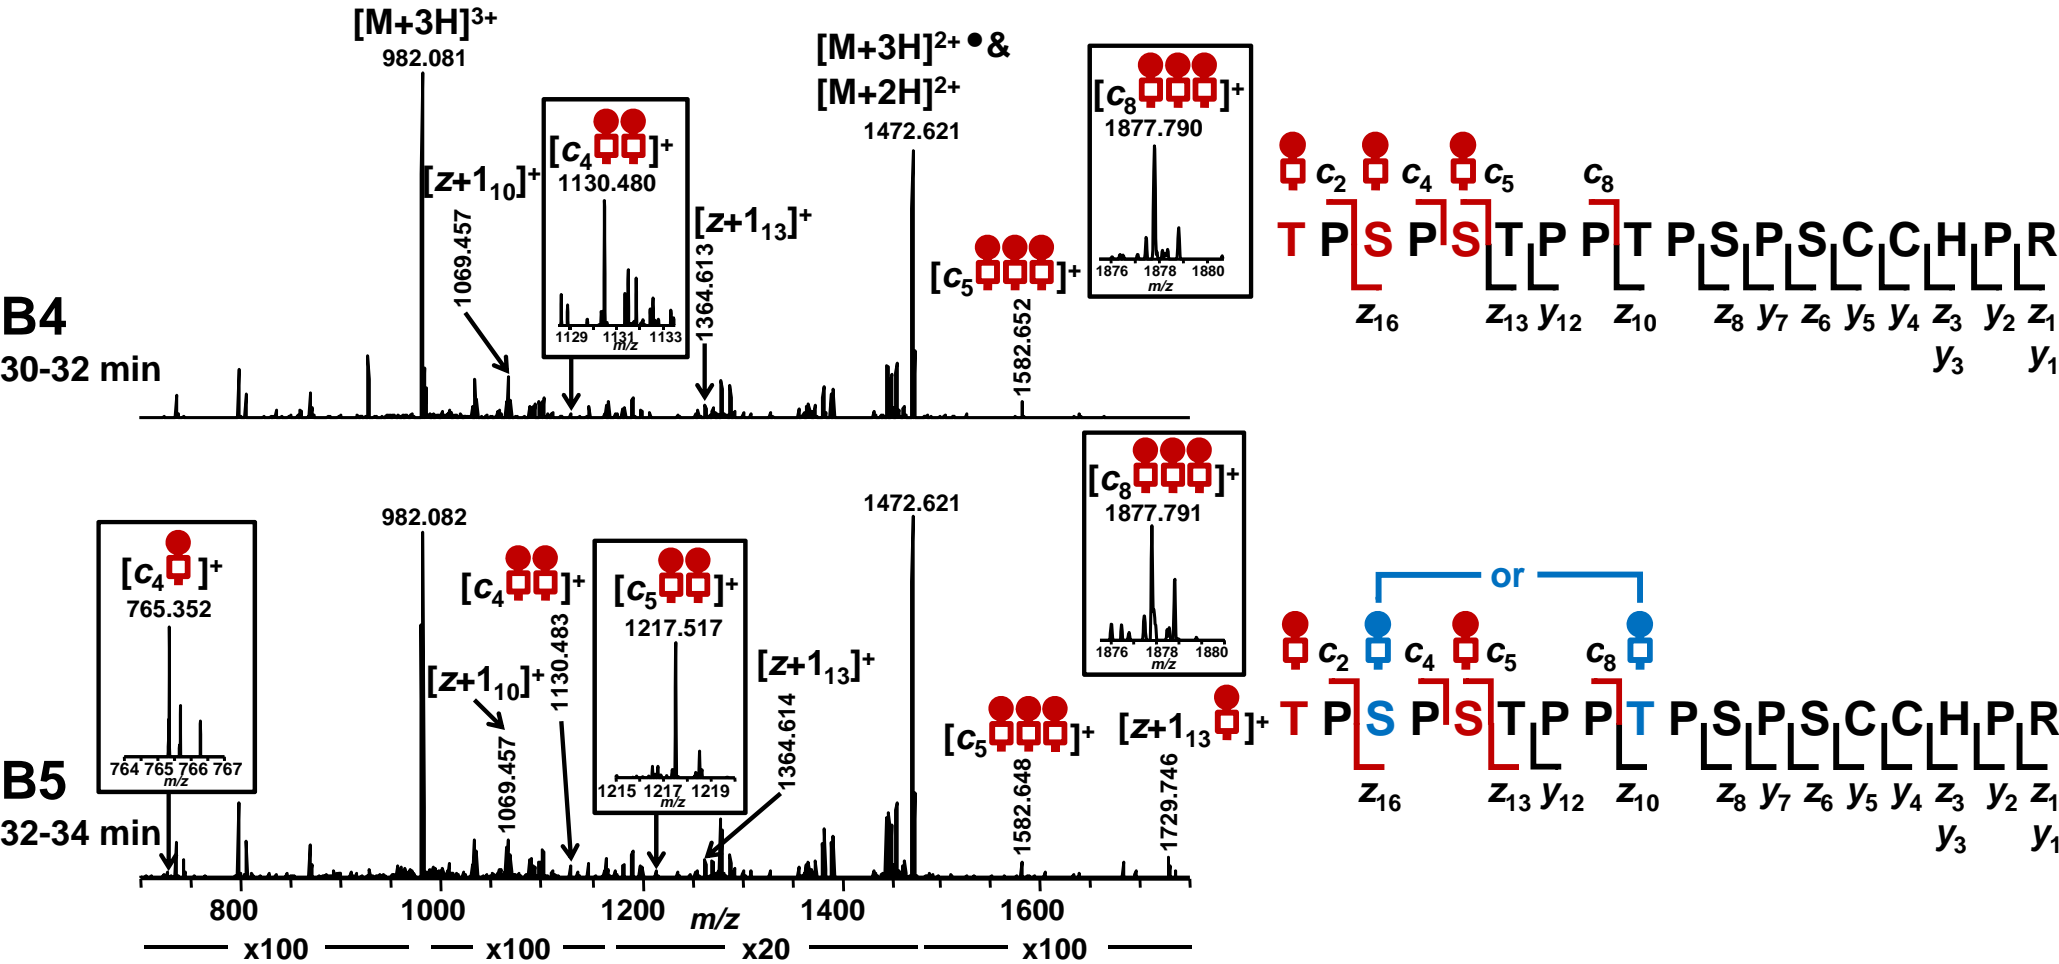

# Thr<sup>228</sup>-Arg<sup>245</sup> + GalNAc<sub>3</sub>Gal<sub>3</sub>

## B4 (30-32 min)

| <i>m/z</i> | Charge | Theoretical MW | Assignment        |   |         | Mass error |
|------------|--------|----------------|-------------------|---|---------|------------|
| 982.081    | 3      | 2944.233       | M                 |   |         | -1.65      |
| 1069.457   | 1      | 1069.455       | z+1 <sub>10</sub> |   |         | 2.08       |
| 1130.480   | 1      | 1130.484       | c <sub>4</sub>    | + | □ 2 ● 2 | -3.10      |
| 1364.613   | 1      | 1364.608       | z+1 <sub>13</sub> |   |         | 3.68       |
| 1472.621   | 2      | 2944.233       | M                 |   |         | 0.48       |
| 1582.652   | 1      | 1582.648       | c <sub>5</sub>    | + | □ 3 ● 3 | 2.72       |
| 1877.790   | 1      | 1877.801       | c <sub>8</sub>    | + | □ 3 ● 3 | -5.80      |

## B5 (32-34 min)

| <i>m/z</i> | Charge | Theoretical MW | Assignment        |   |         | Mass error |
|------------|--------|----------------|-------------------|---|---------|------------|
| 765.352    | 1      | 765.351        | c <sub>4</sub>    | + | □ 1 ● 1 | 0.91       |
| 982.082    | 3      | 2944.233       | M                 |   |         | -0.63      |
| 1069.457   | 1      | 1069.455       | z+1 <sub>10</sub> |   |         | 2.08       |
| 1130.483   | 1      | 1130.484       | c <sub>4</sub>    | + | □ 2 ● 2 | -0.44      |
| 1217.517   | 1      | 1217.516       | c <sub>5</sub>    | + | □ 2 ● 2 | 1.23       |
| 1364.614   | 1      | 1364.608       | z+1 <sub>13</sub> |   |         | 4.41       |
| 1472.621   | 2      | 2944.233       | M                 |   |         | 0.48       |
| 1582.648   | 1      | 1582.648       | c <sub>5</sub>    | + | □ 3 ● 3 | 0.13       |
| 1729.746   | 1      | 1729.740       | z+1 <sub>13</sub> | + | □ 1 ● 1 | 3.36       |
| 1877.791   | 1      | 1877.801       | c <sub>8</sub>    | + | □ 3 ● 3 | -5.27      |

# IgA1 (Mce1) myeloma protein

Thr<sup>228</sup>-Arg<sup>245</sup> + GalNAc<sub>4</sub>Gal<sub>2</sub>

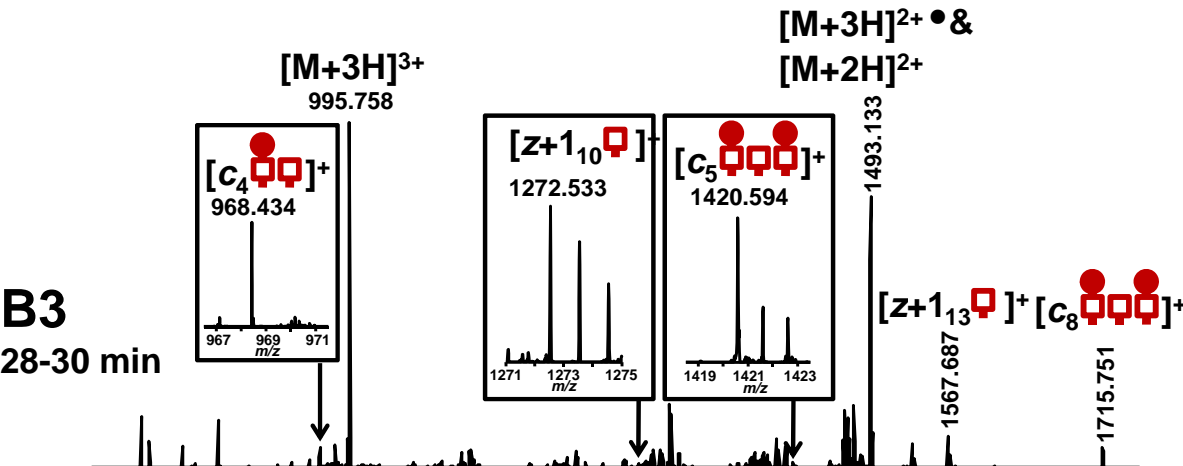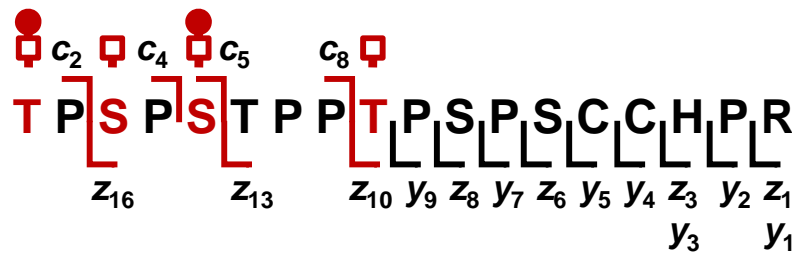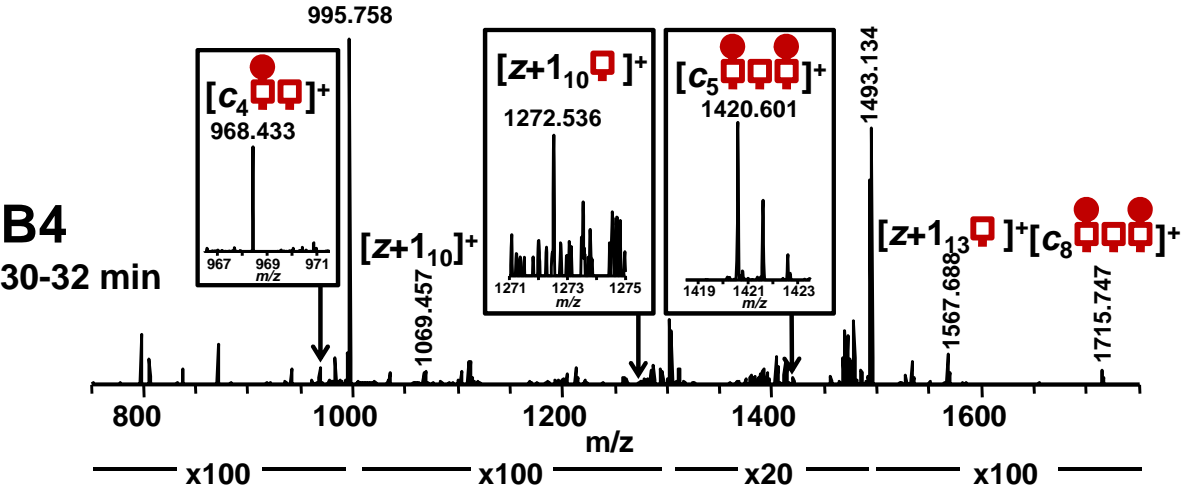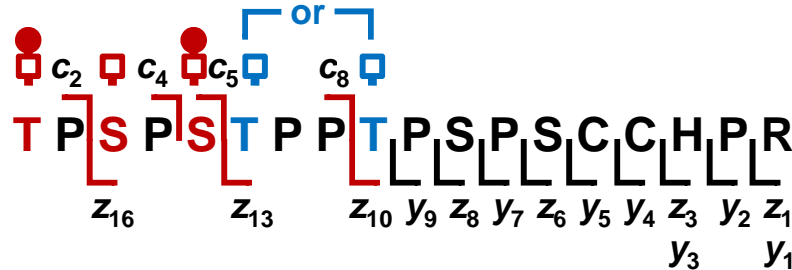



# Thr<sup>228</sup>-Arg<sup>245</sup> + GalNAc<sub>4</sub>Gal<sub>2</sub>

## B3 (28-30 min)

| <i>m/z</i> | Charge | Theoretical MW | Assignment        |           | Mass error |
|------------|--------|----------------|-------------------|-----------|------------|
| 968.434    | 1      | 968.431        | C <sub>4</sub>    | + □ 2 ● 1 | 3.41       |
| 995.759    | 3      | 2985.260       | M                 |           | 0.85       |
| 1272.533   | 1      | 1272.534       | z+1 <sub>10</sub> | + □ 1     | -0.93      |
| 1420.594   | 1      | 1420.595       | C <sub>5</sub>    | + □ 3 ● 2 | -0.63      |
| 1493.133   | 2      | 2985.260       | M                 |           | -0.40      |
| 1567.687   | 1      | 1567.687       | z+1 <sub>13</sub> | + □ 1     | -0.24      |
| 1715.751   | 1      | 1715.748       | C <sub>8</sub>    | + □ 3 ● 2 | 1.69       |

## B4 (30-32 min)

| <i>m/z</i> | Charge | Theoretical MW | Assignment        |           | Mass error |
|------------|--------|----------------|-------------------|-----------|------------|
| 968.433    | 1      | 968.431        | C <sub>4</sub>    | + □ 2 ● 1 | 2.37       |
| 995.758    | 3      | 2985.260       | M                 |           | -0.15      |
| 1069.457   | 1      | 1069.455       | z+1 <sub>10</sub> |           | 2.08       |
| 1272.536   | 1      | 1272.534       | z+1 <sub>10</sub> | + □ 1     | 1.43       |
| 1420.601   | 1      | 1420.595       | C <sub>5</sub>    | + □ 3 ● 2 | 4.29       |
| 1493.134   | 2      | 2985.260       | M                 |           | 0.27       |
| 1567.688   | 1      | 1567.687       | z+1 <sub>13</sub> | + □ 1     | 0.40       |
| 1715.747   | 1      | 1715.748       | C <sub>8</sub>    | + □ 3 ● 2 | -0.64      |

# IgA1 (Mce1) myeloma protein

Thr<sup>228</sup>-Arg<sup>245</sup> + GalNAc<sub>4</sub>Gal<sub>3</sub>

**B2**  
26-28 min

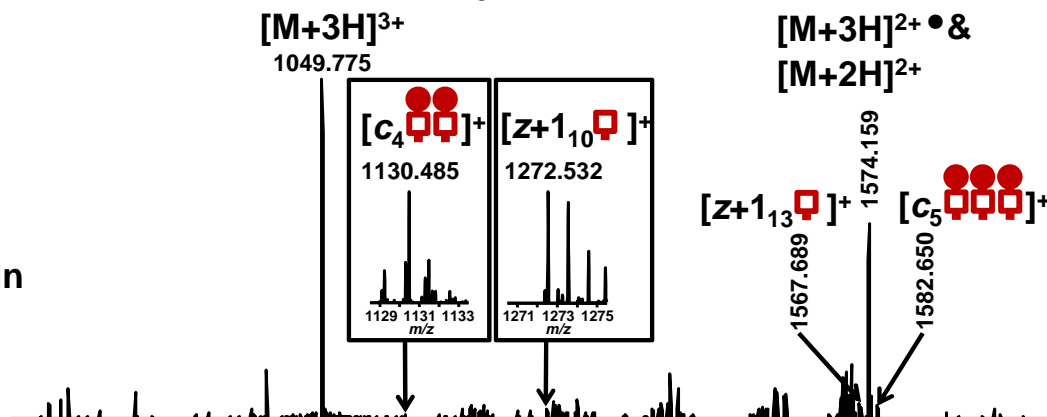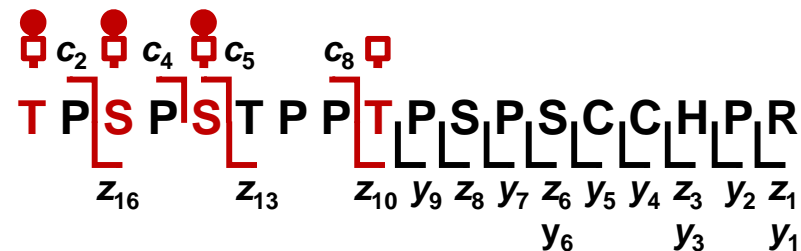

**B3**  
28-30 min

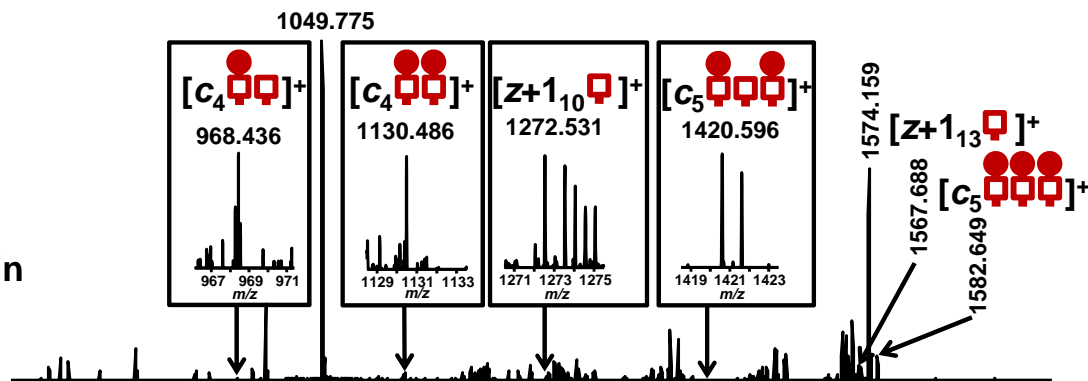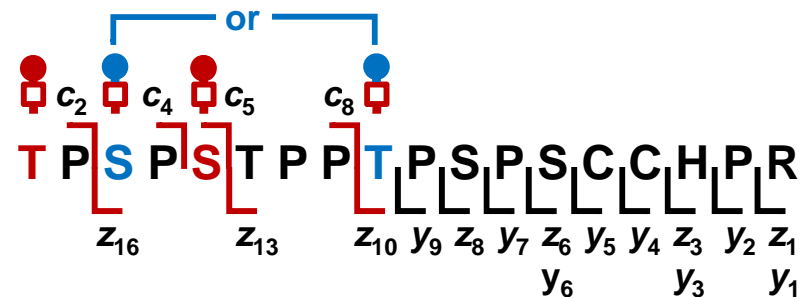

**B4**  
30-32 min

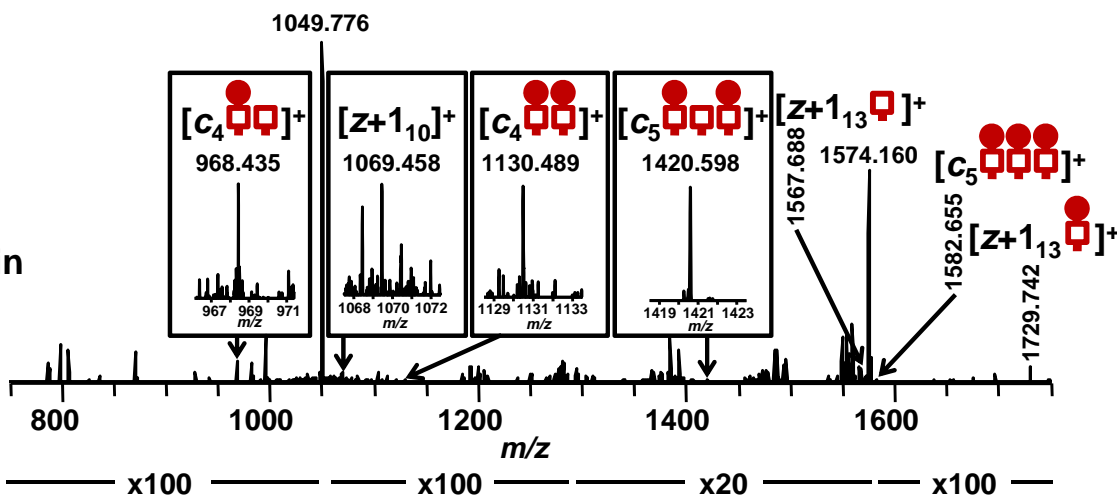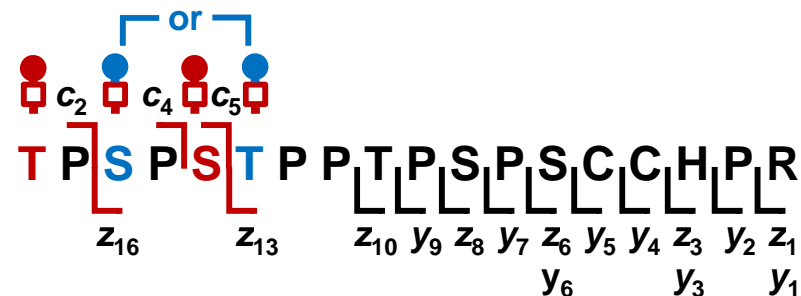

800 1000 1200 1400 1600 1729.742  
m/z  
x100 x100 x20 x100

# Thr<sup>228</sup>-Arg<sup>245</sup> + GalNAc<sub>4</sub>Gal<sub>3</sub>

## B2 (26-28 min)

| <i>m/z</i> | Charge | Theoretical MW | Assignment                                                                        | Mass error |
|------------|--------|----------------|-----------------------------------------------------------------------------------|------------|
| 1049.775   | 3      | 3147.313       | M                                                                                 | -0.72      |
| 1130.485   | 1      | 1130.484       | c <sub>4</sub> + <input type="checkbox"/> 2 <input checked="" type="checkbox"/> 2 | 1.33       |
| 1272.532   | 1      | 1272.534       | z+1 <sub>10</sub> + <input type="checkbox"/> 1                                    | -1.71      |
| 1567.689   | 1      | 1567.687       | z+1 <sub>13</sub> + <input type="checkbox"/> 1                                    | 1.03       |
| 1574.159   | 2      | 3147.313       | M                                                                                 | -0.63      |
| 1582.650   | 1      | 1582.648       | c <sub>5</sub> + <input type="checkbox"/> 3 <input checked="" type="checkbox"/> 3 | 1.45       |

## B3 (28-30 min)

| <i>m/z</i> | Charge | Theoretical MW | Assignment                                                                        | Mass error |
|------------|--------|----------------|-----------------------------------------------------------------------------------|------------|
| 968.436    | 1      | 968.431        | c <sub>4</sub> + <input type="checkbox"/> 2 <input checked="" type="checkbox"/> 1 | 5.47       |
| 1049.775   | 3      | 3147.313       | M                                                                                 | -0.72      |
| 1130.486   | 1      | 1130.484       | c <sub>4</sub> + <input type="checkbox"/> 2 <input checked="" type="checkbox"/> 2 | 2.21       |
| 1272.531   | 1      | 1272.534       | z+1 <sub>10</sub> + <input type="checkbox"/> 1                                    | -2.50      |
| 1420.596   | 1      | 1420.595       | c <sub>5</sub> + <input type="checkbox"/> 3 <input checked="" type="checkbox"/> 2 | 0.77       |
| 1567.688   | 1      | 1567.687       | z+1 <sub>13</sub> + <input type="checkbox"/> 1                                    | 0.40       |
| 1574.159   | 2      | 3147.313       | M                                                                                 | -0.63      |
| 1582.649   | 1      | 1582.648       | c <sub>5</sub> + <input type="checkbox"/> 3 <input checked="" type="checkbox"/> 3 | 0.82       |

## B4 (30-32 min)

| <i>m/z</i> | Charge | Theoretical MW | Assignment                                                                           | Mass error |
|------------|--------|----------------|--------------------------------------------------------------------------------------|------------|
| 968.435    | 1      | 968.431        | c <sub>4</sub> + <input type="checkbox"/> 2 <input checked="" type="checkbox"/> 1    | 4.44       |
| 1049.776   | 3      | 3147.313       | M                                                                                    | 0.24       |
| 1069.458   | 1      | 1069.455       | z+1 <sub>10</sub>                                                                    | 3.01       |
| 1130.489   | 1      | 1130.484       | c <sub>4</sub> + <input type="checkbox"/> 2 <input checked="" type="checkbox"/> 2    | 4.87       |
| 1420.598   | 1      | 1420.595       | c <sub>5</sub> + <input type="checkbox"/> 3 <input checked="" type="checkbox"/> 2    | 2.18       |
| 1567.688   | 1      | 1567.687       | z+1 <sub>13</sub> + <input type="checkbox"/> 1                                       | 0.40       |
| 1574.160   | 2      | 3147.313       | M                                                                                    | 0.01       |
| 1582.655   | 1      | 1582.648       | c <sub>5</sub> + <input type="checkbox"/> 3 <input checked="" type="checkbox"/> 3    | 4.61       |
| 1729.742   | 1      | 1729.740       | z+1 <sub>13</sub> + <input type="checkbox"/> 1 <input checked="" type="checkbox"/> 1 | 1.05       |

# IgA1 (Mce1) myeloma protein

Thr<sup>228</sup>-Arg<sup>245</sup> + GalNAc<sub>4</sub>Gal<sub>4</sub>

**B2**  
26-28 min

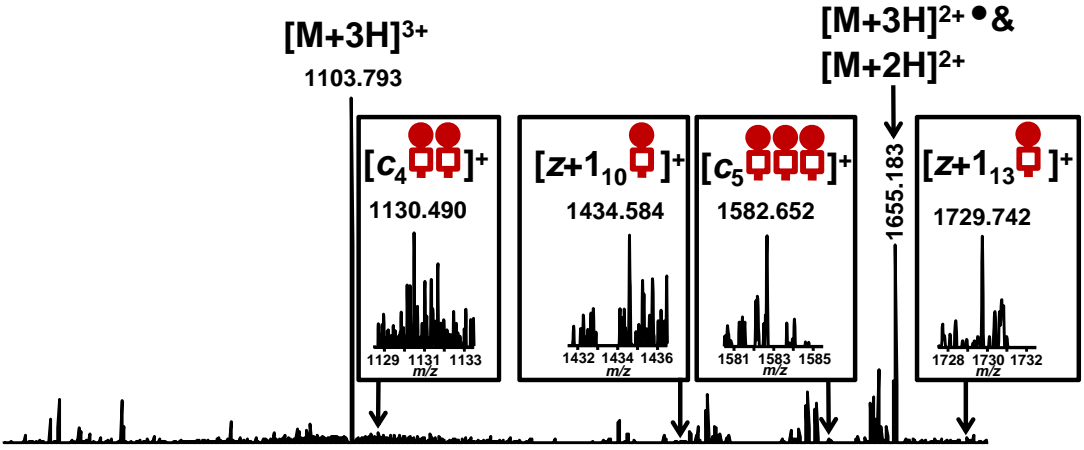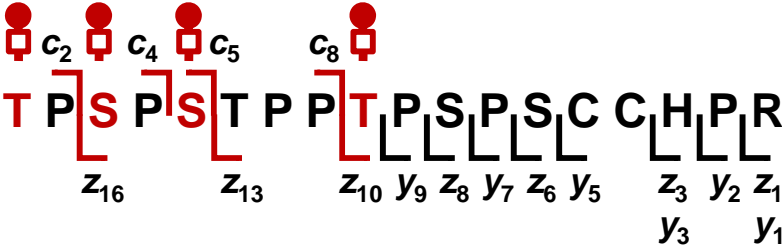

**B3**  
28-30 min

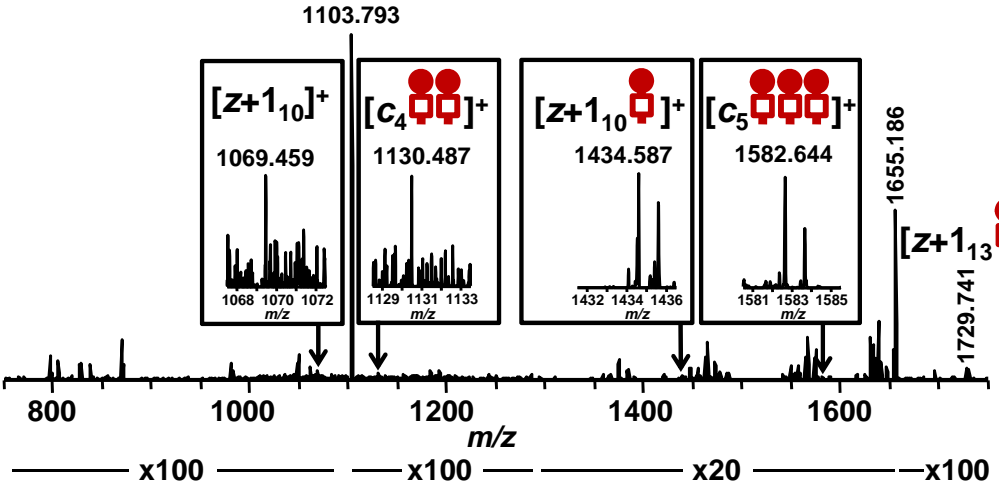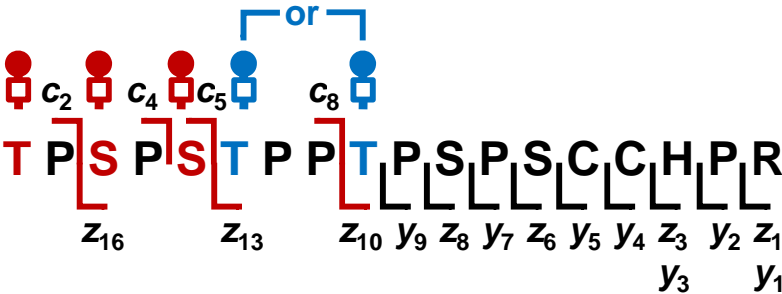

# Thr<sup>228</sup>-Arg<sup>245</sup> + GalNAc<sub>4</sub>Gal<sub>4</sub>

## B2 (26-28 min)

| <i>m/z</i> | Charge | Theoretical MW | Assignment                                                                                | Mass error |
|------------|--------|----------------|-------------------------------------------------------------------------------------------|------------|
| 1103.793   | 3      | 3309.366       | M                                                                                         | -0.32      |
| 1130.490   | 1      | 1130.484       | C <sub>4</sub> + <span style="color:red">□</span> 2 <span style="color:red">●</span> 2    | 5.75       |
| 1434.584   | 1      | 1434.587       | Z+1 <sub>10</sub> + <span style="color:red">□</span> 1 <span style="color:red">●</span> 1 | -2.08      |
| 1582.652   | 1      | 1582.648       | C <sub>5</sub> + <span style="color:red">□</span> 3 <span style="color:red">●</span> 3    | 2.72       |
| 1655.183   | 2      | 3309.366       | M                                                                                         | -2.05      |
| 1729.742   | 1      | 1729.740       | Z+1 <sub>13</sub> + <span style="color:red">□</span> 1 <span style="color:red">●</span> 1 | 1.05       |

## B3 (28-30 min)

| <i>m/z</i> | Charge | Theoretical MW | Assignment                                                                                | Mass error |
|------------|--------|----------------|-------------------------------------------------------------------------------------------|------------|
| 1069.459   | 1      | 1069.455       | Z+1 <sub>10</sub>                                                                         | 3.95       |
| 1103.793   | 3      | 3309.366       | M                                                                                         | -0.32      |
| 1130.487   | 1      | 1130.484       | C <sub>4</sub> + <span style="color:red">□</span> 2 <span style="color:red">●</span> 2    | 3.10       |
| 1434.587   | 1      | 1434.587       | Z+1 <sub>10</sub> + <span style="color:red">□</span> 1 <span style="color:red">●</span> 1 | 0.01       |
| 1582.644   | 1      | 1582.648       | C <sub>5</sub> + <span style="color:red">□</span> 3 <span style="color:red">●</span> 3    | -2.34      |
| 1655.186   | 2      | 3309.366       | M                                                                                         | -0.24      |
| 1729.741   | 1      | 1729.740       | Z+1 <sub>13</sub> + <span style="color:red">□</span> 1 <span style="color:red">●</span> 1 | 0.47       |

# Normal human IgA1

Ser<sup>232</sup>-Arg<sup>245</sup> + GalNAc<sub>1</sub>Gal<sub>1</sub>

AI-ECD FT-ICR MS/MS  
(100 scans)

[M+3H]<sup>2+</sup> • &  
[M+2H]<sup>2+</sup>

[z+1]<sub>13</sub><sup>+</sup>

B3

28-30 min

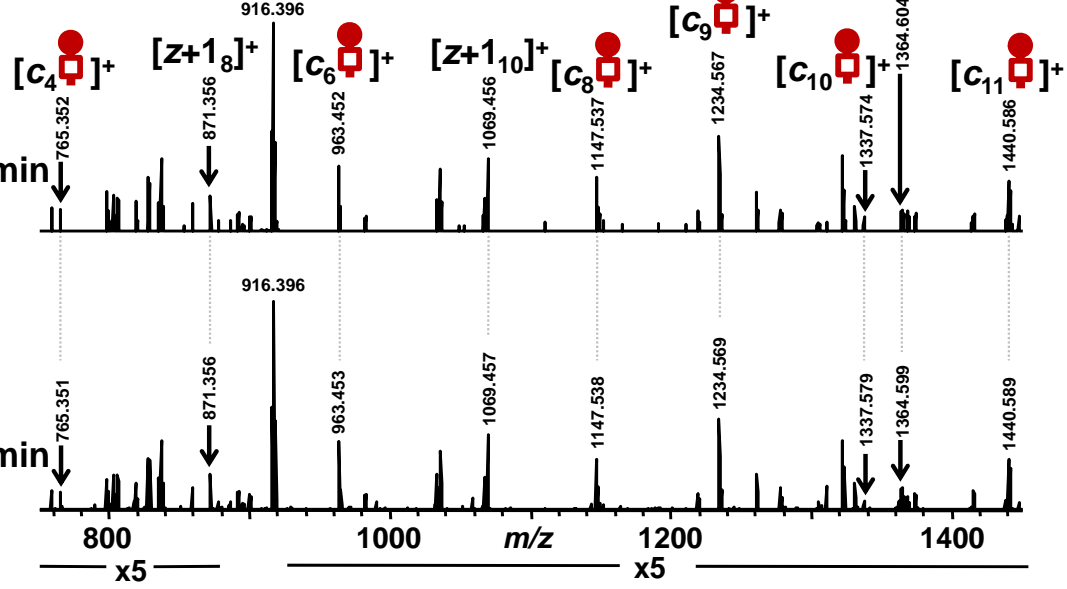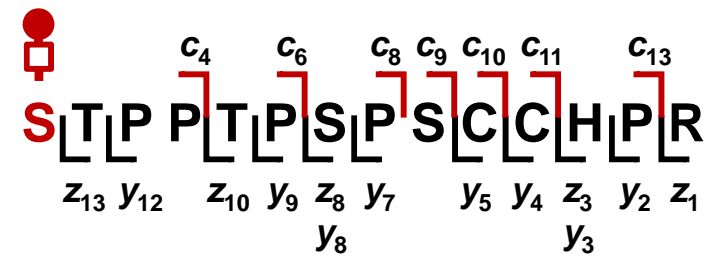

B4

30-32 min

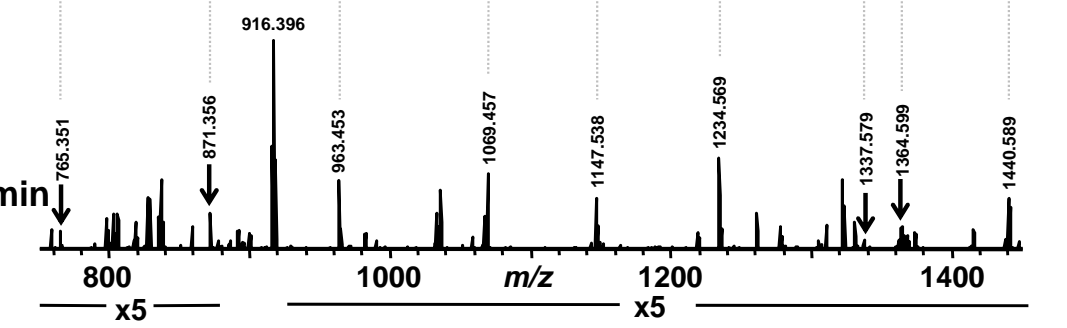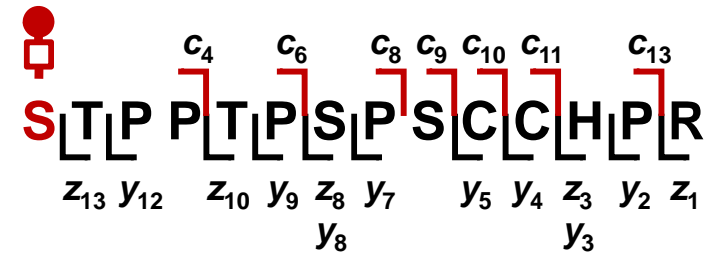

Ser<sup>232</sup>-Arg<sup>245</sup> + GalNAc<sub>1</sub>Gal<sub>1</sub>NeuAc<sub>1</sub>

AI-ECD FT-ICR MS/MS  
(100 scans)

[M+3H]<sup>2+</sup> • &  
[M+2H]<sup>2+</sup>

[z+1]<sub>10</sub><sup>+</sup>

[z+1]<sub>13</sub><sup>+</sup>

B3

28-30 min

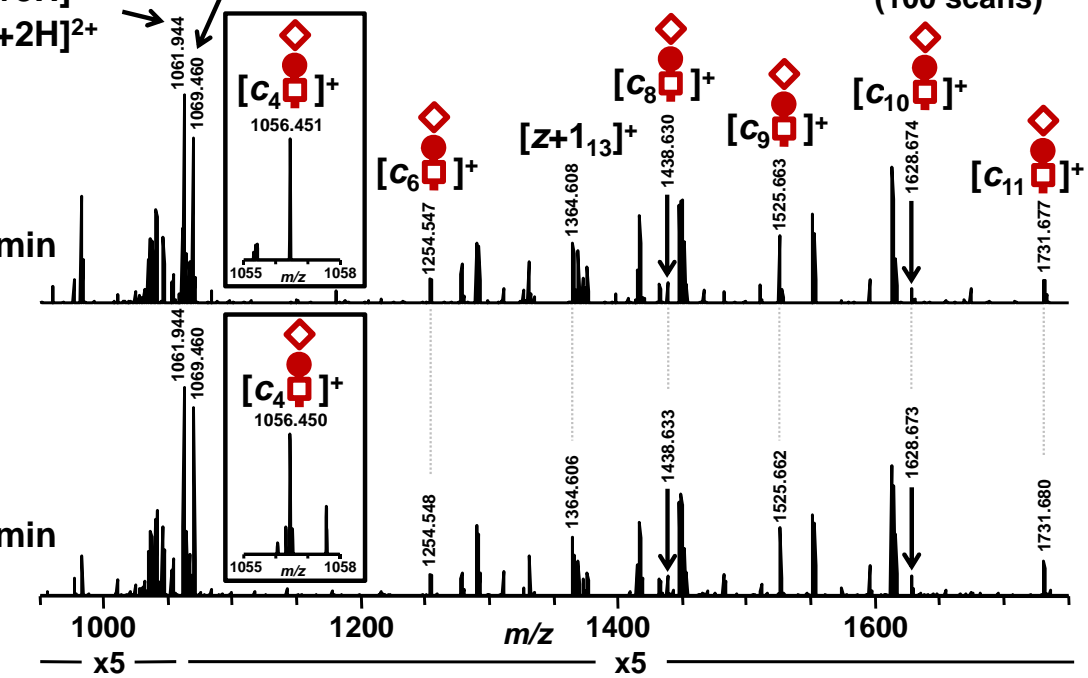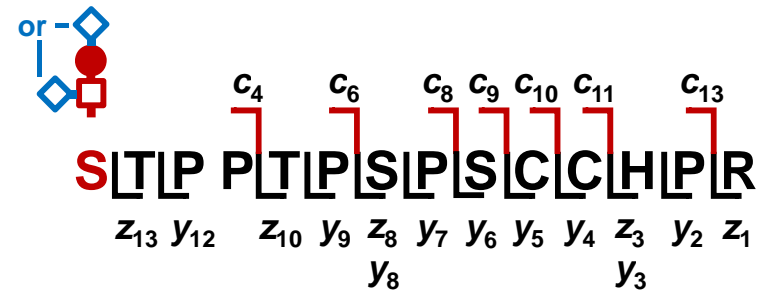

B4

30-32 min

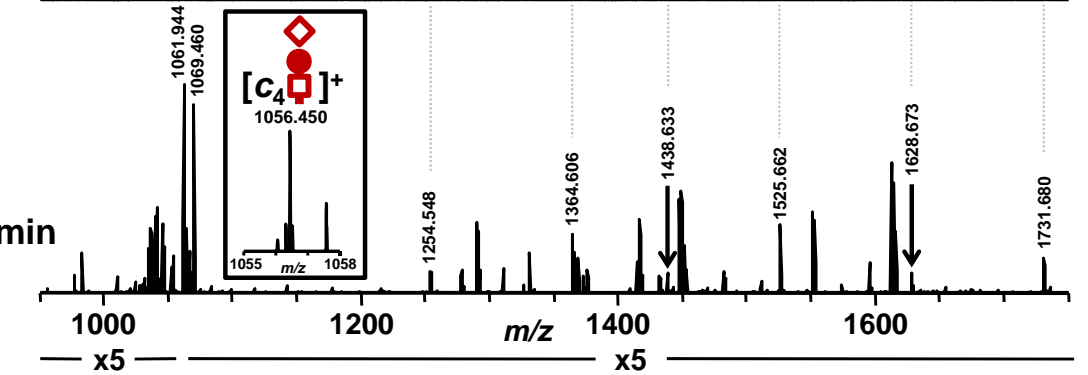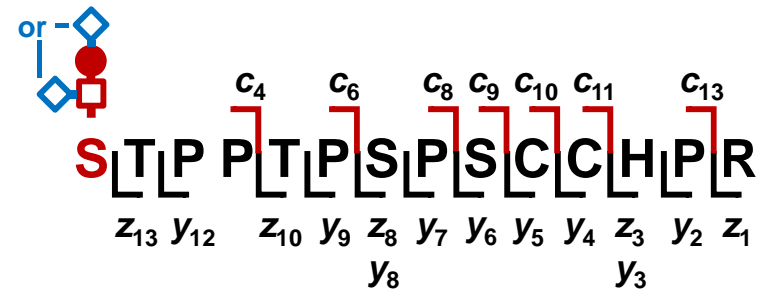

# Ser<sup>232</sup>-Arg<sup>245</sup> + GalNAc<sub>1</sub>Gal<sub>1</sub>

## B3 (28-30 min)

| <i>m/z</i> | Charge | Theoretical MW |                   | Assignment | Mass error |
|------------|--------|----------------|-------------------|------------|------------|
| 765.352    | 1      | 765.351        | C <sub>4</sub>    | + □ 1 ● 1  | 0.91       |
| 871.356    | 1      | 871.354        | Z+1 <sub>8</sub>  |            | 1.86       |
| 916.396    | 2      | 1831.784       | M                 |            | 0.56       |
| 963.452    | 1      | 963.452        | C <sub>6</sub>    | + □ 1 ● 1  | 0.31       |
| 1069.456   | 1      | 1069.455       | Z+1 <sub>10</sub> |            | 1.14       |
| 1147.537   | 1      | 1147.537       | C <sub>8</sub>    | + □ 1 ● 1  | 0.44       |
| 1234.567   | 1      | 1234.569       | C <sub>9</sub>    | + □ 1 ● 1  | -1.21      |
| 1337.574   | 1      | 1337.578       | C <sub>10</sub>   | + □ 1 ● 1  | -2.77      |
| 1364.604   | 1      | 1364.608       | Z+1 <sub>13</sub> |            | -2.92      |
| 1440.586   | 1      | 1440.587       | C <sub>11</sub>   | + □ 1 ● 1  | -0.62      |

## B4 (30-32 min)

| <i>m/z</i> | Charge | Theoretical MW |                   | Assignment | Mass error |
|------------|--------|----------------|-------------------|------------|------------|
| 765.351    | 1      | 765.351        | C <sub>4</sub>    | + □ 1 ● 1  | -0.39      |
| 871.356    | 1      | 871.354        | Z+1 <sub>8</sub>  |            | 1.86       |
| 916.396    | 2      | 1831.784       | M                 |            | 0.56       |
| 963.453    | 1      | 963.452        | C <sub>6</sub>    | + □ 1 ● 1  | 1.35       |
| 1069.457   | 1      | 1069.455       | Z+1 <sub>10</sub> |            | 2.08       |
| 1147.538   | 1      | 1147.537       | C <sub>8</sub>    | + □ 1 ● 1  | 1.31       |
| 1234.569   | 1      | 1234.569       | C <sub>9</sub>    | + □ 1 ● 1  | 0.40       |
| 1337.579   | 1      | 1337.578       | C <sub>10</sub>   | + □ 1 ● 1  | 0.97       |
| 1364.599   | 1      | 1364.608       | Z+1 <sub>13</sub> |            | -6.29      |
| 1440.589   | 1      | 1440.587       | C <sub>11</sub>   | + □ 1 ● 1  | 1.46       |

**Ser<sup>232</sup>-Arg<sup>245</sup> + GalNAc<sub>1</sub>Gal<sub>1</sub>NeuAc<sub>1</sub>**

**B3 (28-30 min)**

| <i>m/z</i> | Charge | Theoretical MW |                   | Assignment    | Mass error |
|------------|--------|----------------|-------------------|---------------|------------|
| 1056.451   | 1      | 1056.447       | C <sub>4</sub>    | + □ 1 ● 1 ◇ 1 | 4.07       |
| 1061.944   | 2      | 2122.879       | M                 |               | 0.76       |
| 1069.460   | 1      | 1069.455       | Z+1 <sub>10</sub> |               | 4.88       |
| 1254.547   | 1      | 1254.547       | C <sub>6</sub>    | + □ 1 ● 1 ◇ 1 | -0.08      |
| 1364.608   | 1      | 1364.608       | Z+1 <sub>13</sub> |               | 0.01       |
| 1438.630   | 1      | 1438.632       | C <sub>8</sub>    | + □ 1 ● 1 ◇ 1 | -1.32      |
| 1525.663   | 1      | 1525.664       | C <sub>9</sub>    | + □ 1 ● 1 ◇ 1 | -0.59      |
| 1628.674   | 1      | 1628.673       | C <sub>10</sub>   | + □ 1 ● 1 ◇ 1 | 0.55       |
| 1731.677   | 1      | 1731.682       | C <sub>11</sub>   | + □ 1 ● 1 ◇ 1 | -3.06      |

**B4 (30-32 min)**

| <i>m/z</i> | Charge | Theoretical MW |                   | Assignment    | Mass error |
|------------|--------|----------------|-------------------|---------------|------------|
| 1056.450   | 1      | 1056.447       | C <sub>4</sub>    | + □ 1 ● 1 ◇ 1 | 3.12       |
| 1061.944   | 2      | 2122.879       | M                 |               | 0.76       |
| 1069.460   | 1      | 1069.455       | Z+1 <sub>10</sub> |               | 4.88       |
| 1254.548   | 1      | 1254.547       | C <sub>6</sub>    | + □ 1 ● 1 ◇ 1 | 0.72       |
| 1364.606   | 1      | 1364.608       | Z+1 <sub>13</sub> |               | -1.45      |
| 1438.633   | 1      | 1438.632       | C <sub>8</sub>    | + □ 1 ● 1 ◇ 1 | 0.76       |
| 1525.662   | 1      | 1525.664       | C <sub>9</sub>    | + □ 1 ● 1 ◇ 1 | -1.25      |
| 1628.673   | 1      | 1628.673       | C <sub>10</sub>   | + □ 1 ● 1 ◇ 1 | -0.06      |
| 1731.680   | 1      | 1731.682       | C <sub>11</sub>   | + □ 1 ● 1 ◇ 1 | -1.33      |



# Normal human IgA1

Ser<sup>232</sup>-Arg<sup>245</sup> + GalNAc<sub>2</sub>Gal<sub>1</sub>

AI-ECD FT-ICR MS/MS  
(100 scans)

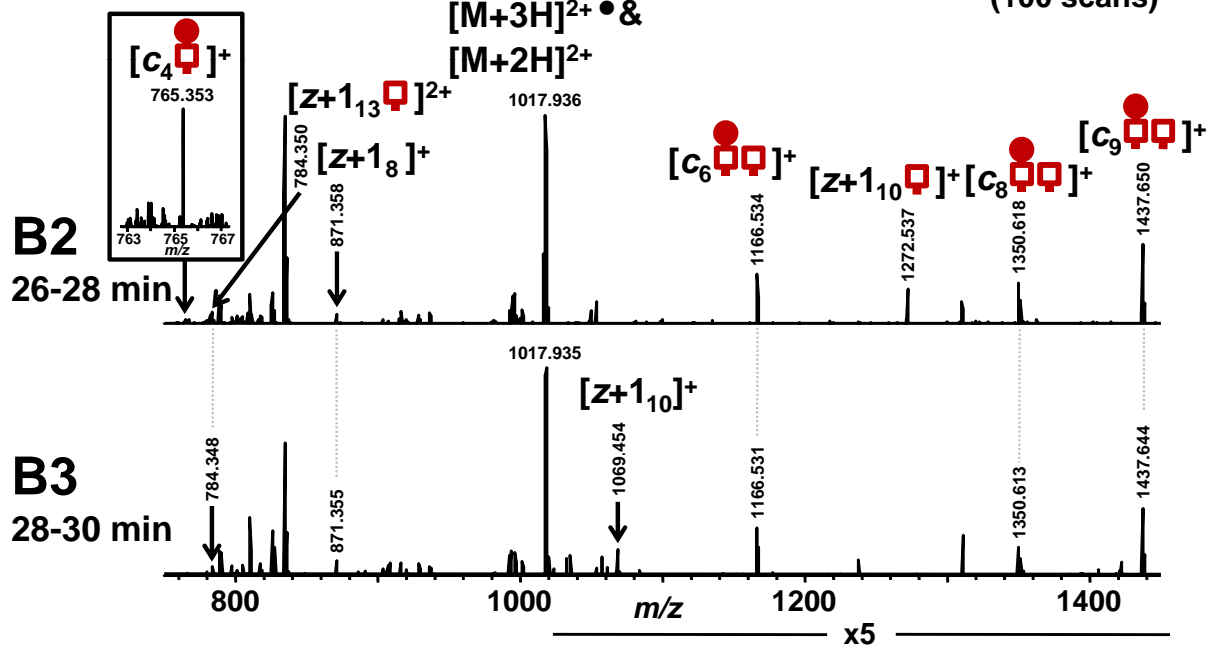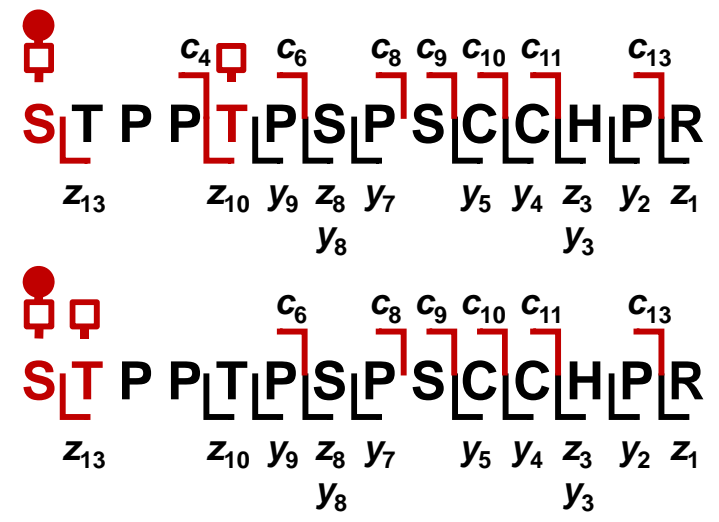

Ser<sup>232</sup>-Arg<sup>245</sup> + GalNAc<sub>2</sub>Gal<sub>1</sub>NeuAc<sub>1</sub>

AI-ECD FT-ICR MS/MS  
(100 scans)

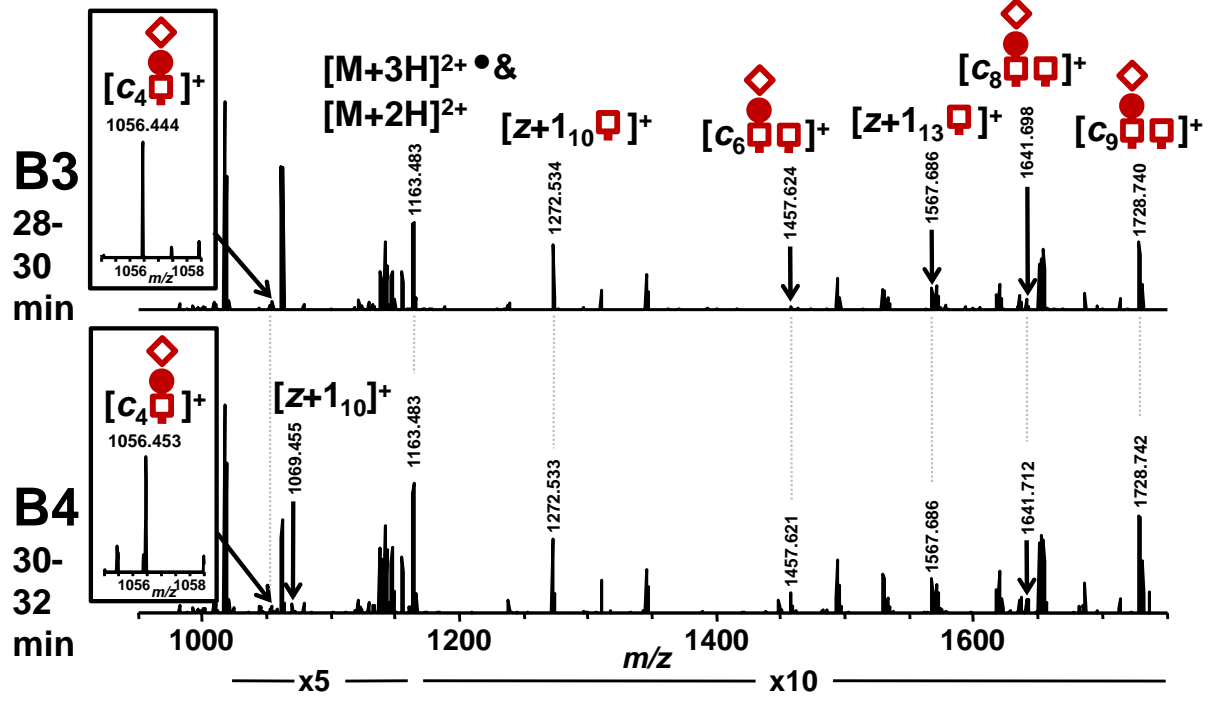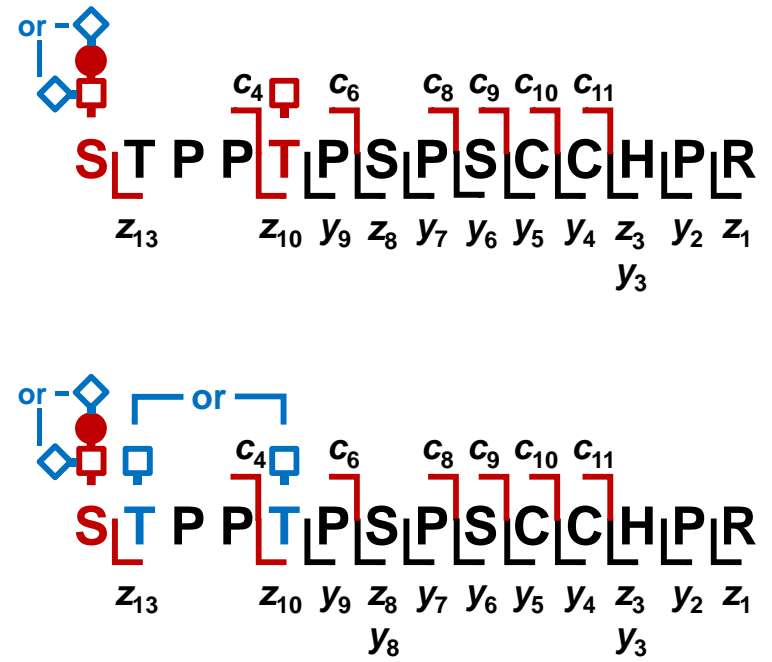

**Ser<sup>232</sup>-Arg<sup>245</sup> + GalNAc<sub>2</sub>Gal<sub>1</sub>**

**B2 (26-28 min)**

| <i>m/z</i> | Charge | Theoretical MW |                   | Assignment | Mass error |
|------------|--------|----------------|-------------------|------------|------------|
| 765.353    | 1      | 765.351        | C <sub>4</sub>    | + □ 1 ● 1  | 2.22       |
| 784.350    | 2      | 1567.687       | Z+1 <sub>13</sub> | + □ 1      | 3.41       |
| 871.358    | 1      | 871.354        | Z+1 <sub>8</sub>  |            | 4.15       |
| 1017.936   | 2      | 2034.863       | M                 |            | 0.80       |
| 1166.534   | 1      | 1166.531       | C <sub>6</sub>    | + □ 2 ● 1  | 2.49       |
| 1272.537   | 1      | 1272.534       | Z+1 <sub>10</sub> | + □ 1      | 2.22       |
| 1350.618   | 1      | 1350.616       | C <sub>8</sub>    | + □ 2 ● 1  | 1.55       |
| 1437.650   | 1      | 1437.648       | C <sub>9</sub>    | + □ 2 ● 1  | 1.46       |

**B3 (28-30 min)**

| <i>m/z</i> | Charge | Theoretical MW |                   | Assignment | Mass error |
|------------|--------|----------------|-------------------|------------|------------|
| 784.348    | 2      | 1567.687       | Z+1 <sub>13</sub> | + □ 1      | 0.85       |
| 871.355    | 1      | 871.354        | Z+1 <sub>8</sub>  |            | 0.71       |
| 1017.935   | 2      | 2034.863       | M                 |            | -0.19      |
| 1069.454   | 1      | 1069.455       | Z+1 <sub>10</sub> |            | -0.73      |
| 1166.531   | 1      | 1166.531       | C <sub>6</sub>    | + □ 2 ● 1  | -0.09      |
| 1350.613   | 1      | 1350.616       | C <sub>8</sub>    | + □ 2 ● 1  | -2.15      |
| 1437.644   | 1      | 1437.648       | C <sub>9</sub>    | + □ 2 ● 1  | -2.71      |

**Ser<sup>232</sup>-Arg<sup>245</sup> + GalNAc<sub>2</sub>Gal<sub>1</sub>NeuAc<sub>1</sub>**

**B3 (28-30 min)**

| <i>m/z</i> | Charge | Theoretical MW |                   | Assignment    | Mass error |
|------------|--------|----------------|-------------------|---------------|------------|
| 1056.444   | 1      | 1056.447       | C <sub>4</sub>    | + □ 1 ● 1 ◇ 1 | -2.56      |
| 1163.483   | 2      | 2325.959       | M                 |               | 0.09       |
| 1272.534   | 1      | 1272.534       | Z+1 <sub>10</sub> | + □ 1         | -0.14      |
| 1457.624   | 1      | 1457.627       | C <sub>6</sub>    | + □ 2 ● 1 ◇ 1 | -1.72      |
| 1567.686   | 1      | 1567.687       | Z+1 <sub>13</sub> | + □ 1         | -0.88      |
| 1641.698   | 1      | 1641.711       | C <sub>8</sub>    | + □ 2 ● 1 ◇ 1 | -8.10      |
| 1728.740   | 1      | 1728.743       | C <sub>9</sub>    | + □ 2 ● 1 ◇ 1 | -1.91      |

**B4 (30-32 min)**

| <i>m/z</i> | Charge | Theoretical MW |                   | Assignment    | Mass error |
|------------|--------|----------------|-------------------|---------------|------------|
| 1056.453   | 1      | 1056.447       | C <sub>4</sub>    | + □ 1 ● 1 ◇ 1 | 5.96       |
| 1069.455   | 1      | 1069.455       | Z+1 <sub>10</sub> |               | 0.21       |
| 1163.483   | 2      | 2325.959       | M                 |               | 0.09       |
| 1272.533   | 1      | 1272.534       | Z+1 <sub>10</sub> | + □ 1         | -0.93      |
| 1457.621   | 1      | 1457.627       | C <sub>6</sub>    | + □ 2 ● 1 ◇ 1 | -3.77      |
| 1567.686   | 1      | 1567.687       | Z+1 <sub>13</sub> | + □ 1         | -0.88      |
| 1641.712   | 1      | 1641.711       | C <sub>8</sub>    | + □ 2 ● 1 ◇ 1 | 0.43       |
| 1728.742   | 1      | 1728.743       | C <sub>9</sub>    | + □ 2 ● 1 ◇ 1 | -0.75      |

# Normal human IgA1

Ser<sup>232</sup>-Arg<sup>245</sup> + GalNAc<sub>2</sub>Gal<sub>2</sub> [M+3H]<sup>2+</sup> • & [M+2H]<sup>2+</sup>

AI-ECD FT-ICR MS/MS (100 scans)

**B2**  
26-28 min

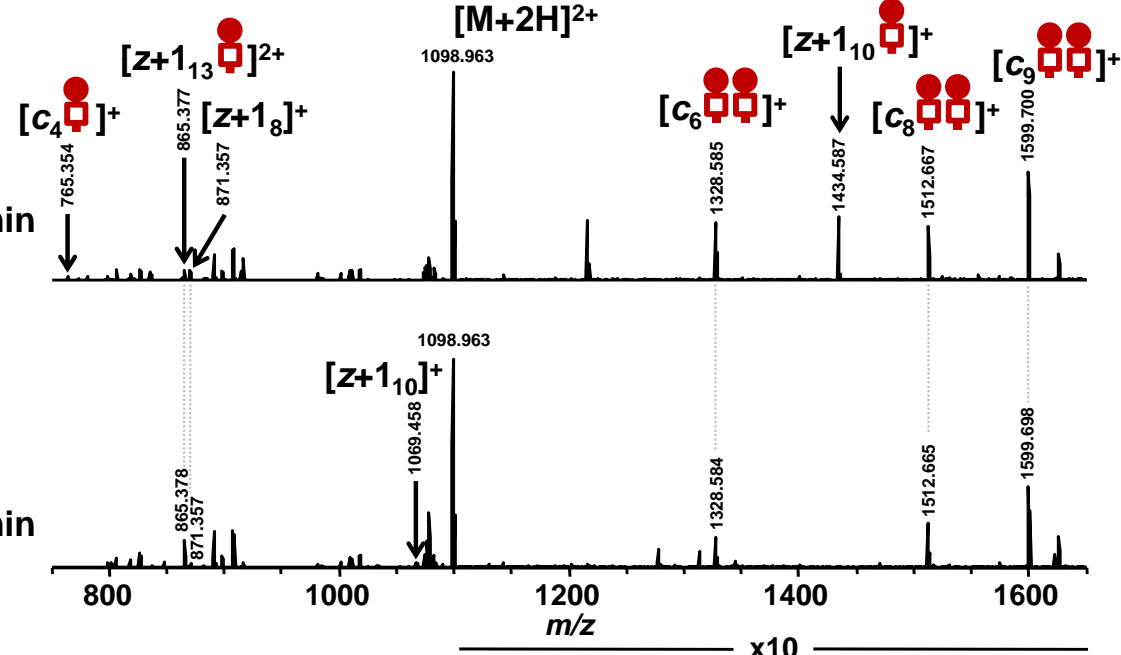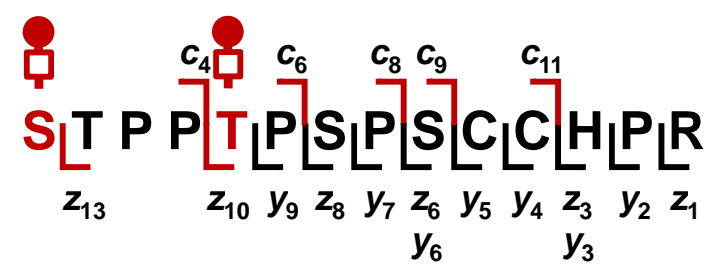

**B3**  
28-30 min

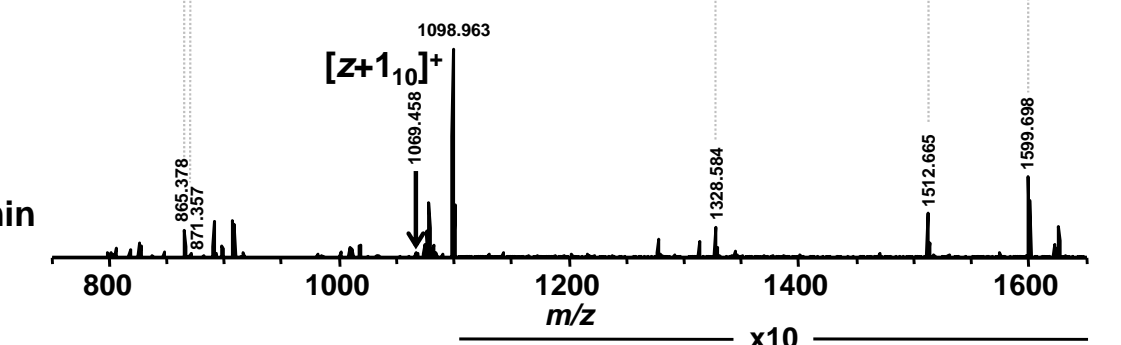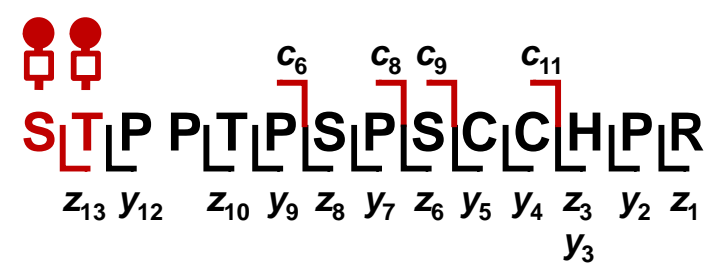

Ser<sup>232</sup>-Arg<sup>245</sup> + GalNAc<sub>2</sub>Gal<sub>2</sub>NeuAc<sub>1</sub> [M+3H]<sup>2+</sup> • & [M+2H]<sup>2+</sup>

AI-ECD FT-ICR MS/MS (100 scans)

**B3**  
28-30 min

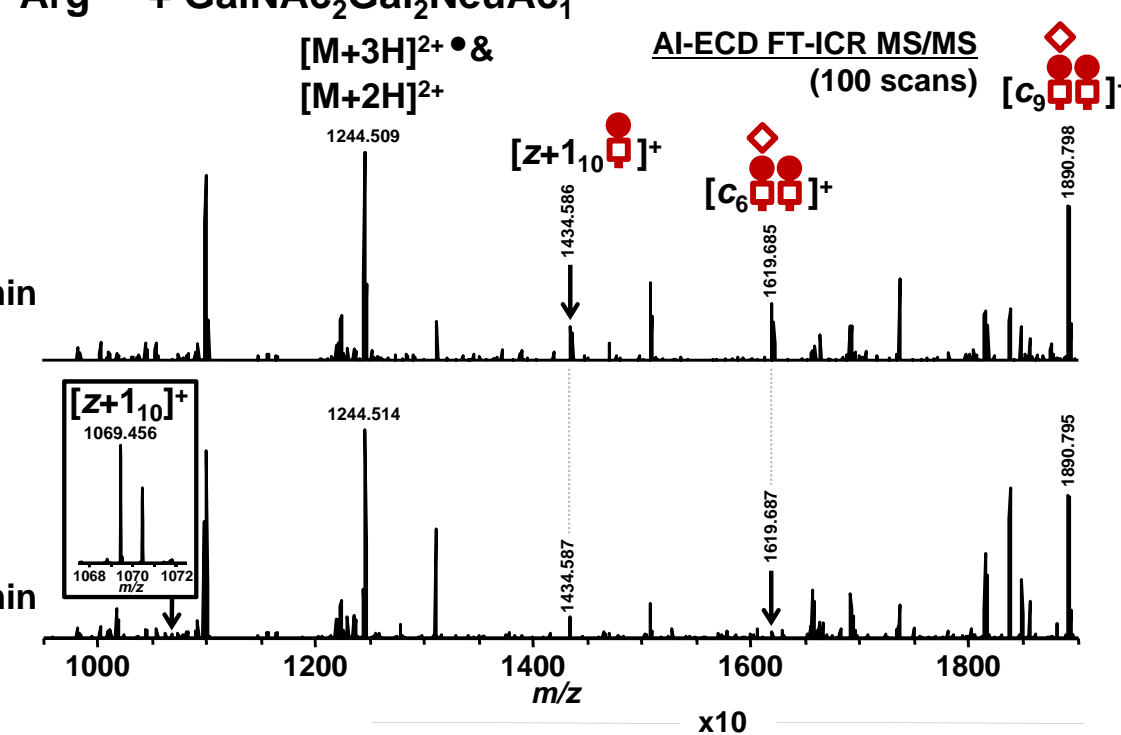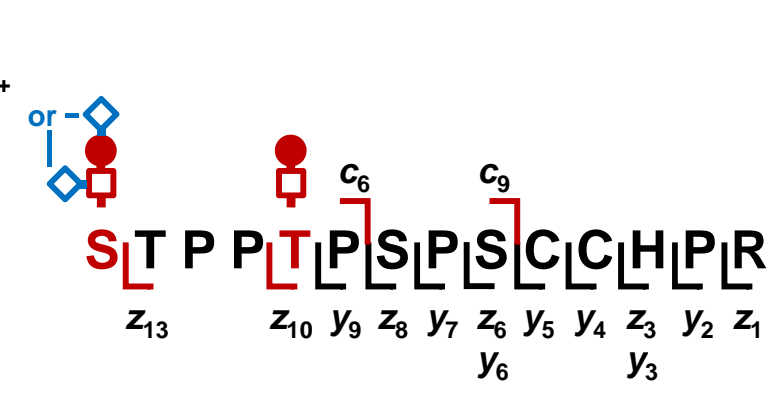

**B4**  
30-32 min

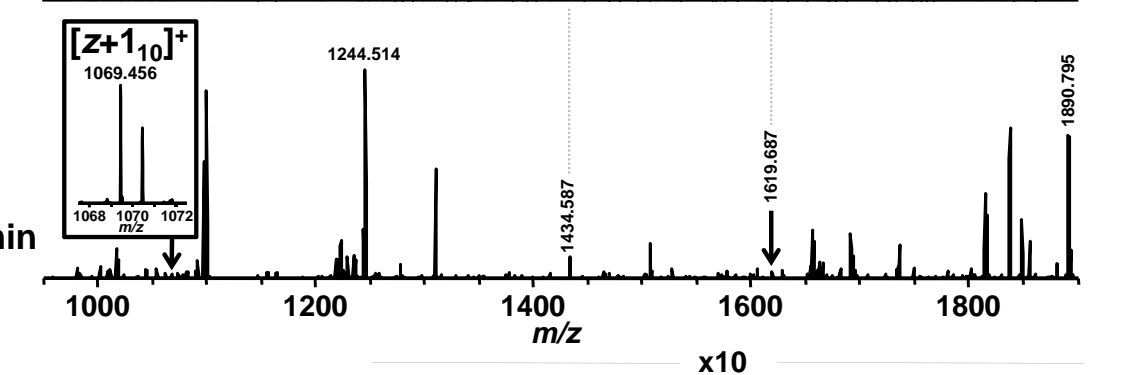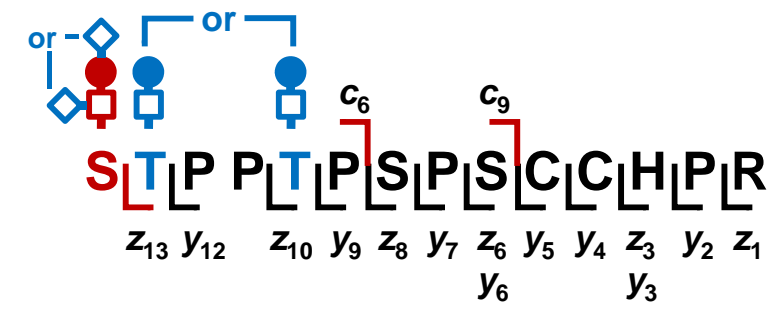

**Ser<sup>232</sup>-Arg<sup>245</sup> + GalNAc<sub>2</sub>Gal<sub>2</sub>**

**B2 (26-28 min)**

| <i>m/z</i> | Charge | Theoretical MW |                   | Assignment |         |       | Mass error |
|------------|--------|----------------|-------------------|------------|---------|-------|------------|
| 765.354    | 1      | 765.351        | C <sub>4</sub>    | +          | □ 1 ● 1 | 3.53  |            |
| 865.377    | 2      | 1729.740       | Z+1 <sub>13</sub> | +          | □ 1 ● 1 | 3.78  |            |
| 871.357    | 1      | 871.354        | Z+1 <sub>8</sub>  |            |         | 3.01  |            |
| 1098.963   | 2      | 2196.916       | M                 |            |         | 1.28  |            |
| 1328.585   | 1      | 1328.584       | C <sub>6</sub>    | +          | □ 2 ● 2 | 0.83  |            |
| 1434.587   | 1      | 1434.587       | Z+1 <sub>10</sub> | +          | □ 1 ● 1 | 0.01  |            |
| 1512.667   | 1      | 1512.669       | C <sub>8</sub>    | +          | □ 2 ● 2 | -1.12 |            |
| 1599.700   | 1      | 1599.701       | C <sub>9</sub>    | +          | □ 2 ● 2 | -0.44 |            |

**B3 (28-30 min)**

| <i>m/z</i> | Charge | Theoretical MW |                   | Assignment |         |       | Mass error |
|------------|--------|----------------|-------------------|------------|---------|-------|------------|
| 865.378    | 2      | 1729.740       | Z+1 <sub>13</sub> | +          | □ 1 ● 1 | 4.94  |            |
| 871.357    | 1      | 871.354        | Z+1 <sub>8</sub>  |            |         | 3.01  |            |
| 1069.458   | 1      | 1069.455       | Z+1 <sub>10</sub> |            |         | 3.01  |            |
| 1098.963   | 2      | 2196.916       | M                 |            |         | 1.28  |            |
| 1328.584   | 1      | 1328.584       | C <sub>6</sub>    | +          | □ 2 ● 2 | 0.08  |            |
| 1512.665   | 1      | 1512.669       | C <sub>8</sub>    | +          | □ 2 ● 2 | -2.45 |            |
| 1599.698   | 1      | 1599.701       | C <sub>9</sub>    | +          | □ 2 ● 2 | -1.69 |            |

**Ser<sup>232</sup>-Arg<sup>245</sup> + GalNAc<sub>2</sub>Gal<sub>2</sub>NeuAc<sub>1</sub>**

**B3 (28-30 min)**

| <i>m/z</i> | Charge | Theoretical MW | Assignment                   | Mass error |
|------------|--------|----------------|------------------------------|------------|
| 1244.509   | 2      | 2488.011       | M                            | -0.23      |
| 1434.586   | 1      | 1434.587       | z+1 <sub>10</sub> + □ 1 ● 1  | -0.68      |
| 1619.685   | 1      | 1619.679       | c <sub>6</sub> + □ 2 ● 2 ◇ 1 | 3.52       |
| 1890.798   | 1      | 1890.796       | c <sub>9</sub> + □ 2 ● 2 ◇ 1 | 1.00       |

**B4 (30-32 min)**

| <i>m/z</i> | Charge | Theoretical MW | Assignment                   | Mass error |
|------------|--------|----------------|------------------------------|------------|
| 1069.456   | 1      | 1069.455       | z+1 <sub>10</sub>            | 1.14       |
| 1244.514   | 2      | 2488.011       | M                            | 3.79       |
| 1434.587   | 1      | 1434.587       | z+1 <sub>10</sub> + □ 1 ● 1  | 0.01       |
| 1619.687   | 1      | 1619.679       | c <sub>6</sub> + □ 2 ● 2 ◇ 1 | 4.75       |
| 1890.795   | 1      | 1890.796       | c <sub>9</sub> + □ 2 ● 2 ◇ 1 | -0.58      |

# Normal human IgA1

Ser<sup>232</sup>-Arg<sup>245</sup> + GalNAc<sub>3</sub>Gal<sub>1</sub>

AI-ECD FT-ICR MS/MS  
(100 scans)

B2

26-28 min

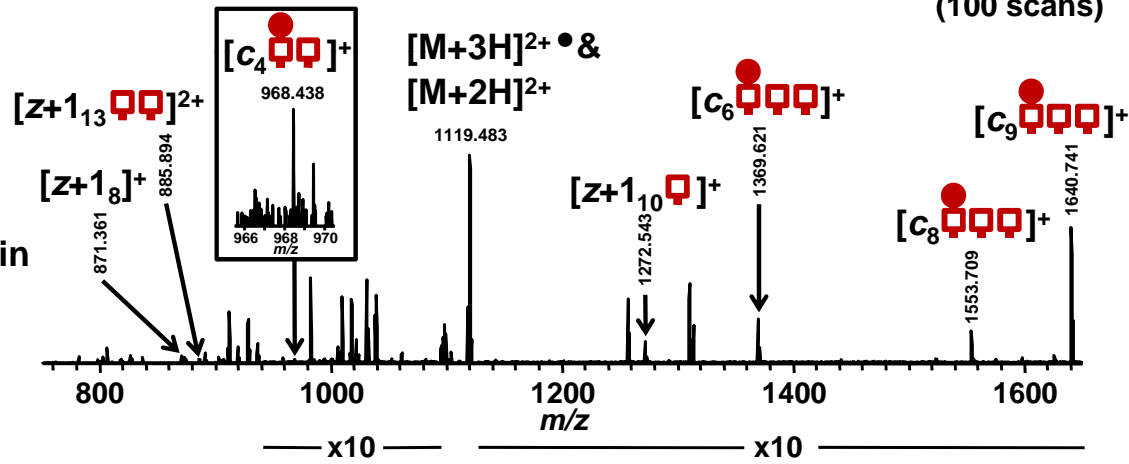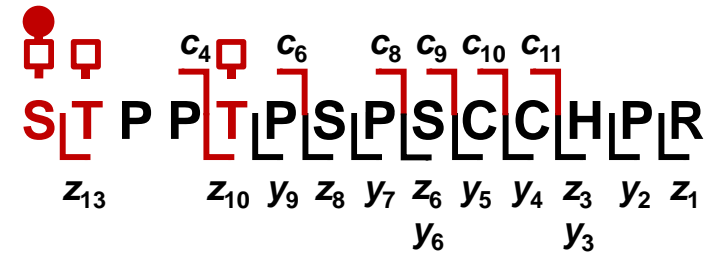

Ser<sup>232</sup>-Arg<sup>245</sup> + GalNAc<sub>3</sub>Gal<sub>2</sub>

AI-ECD FT-ICR MS/MS  
(100 scans)

B2

26-28 min

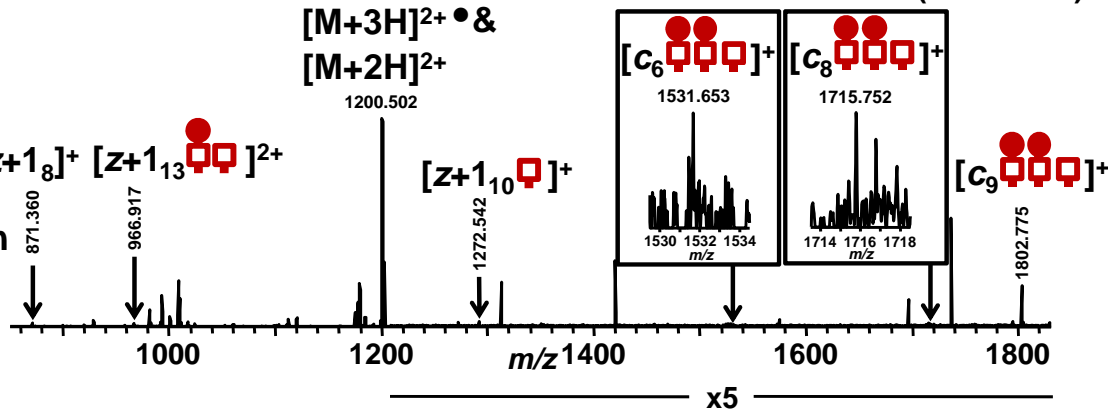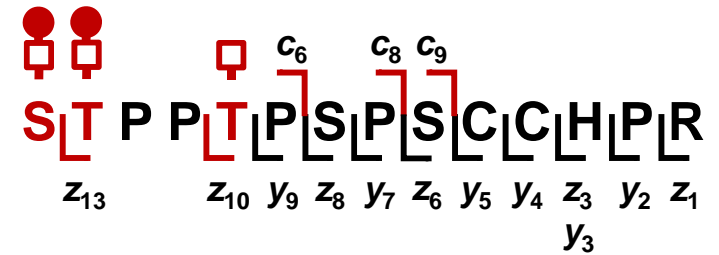

## Ser<sup>232</sup>-Arg<sup>245</sup> + GalNAc<sub>3</sub>Gal<sub>1</sub>

### B2 (26-28 min)

| <i>m/z</i> | Charge | Theoretical MW | Assignment               | Mass error |
|------------|--------|----------------|--------------------------|------------|
| 871.361    | 1      | 871.354        | z+1 <sub>8</sub>         | 7.60       |
| 885.894    | 2      | 1770.767       | z+1 <sub>13</sub> + □ 2  | 7.87       |
| 968.438    | 1      | 968.431        | c <sub>4</sub> + □ 2 ● 1 | 7.54       |
| 1119.483   | 2      | 2237.943       | M                        | 7.25       |
| 1272.543   | 1      | 1272.534       | z+1 <sub>10</sub> + □ 1  | 6.93       |
| 1369.621   | 1      | 1369.611       | c <sub>6</sub> + □ 3 ● 1 | 7.67       |
| 1553.709   | 1      | 1553.695       | c <sub>8</sub> + □ 3 ● 1 | 8.82       |
| 1640.741   | 1      | 1640.727       | c <sub>9</sub> + □ 3 ● 1 | 8.35       |

## Ser<sup>232</sup>-Arg<sup>245</sup> + GalNAc<sub>3</sub>Gal<sub>2</sub>

### B2 (26-28 min)

| <i>m/z</i> | Charge | Theoretical MW | Assignment                  | Mass error |
|------------|--------|----------------|-----------------------------|------------|
| 871.360    | 1      | 871.354        | z+1 <sub>8</sub>            | 6.45       |
| 966.917    | 2      | 1932.820       | z+1 <sub>13</sub> + □ 2 ● 1 | 3.69       |
| 1200.502   | 2      | 2399.995       | M                           | 1.43       |
| 1272.542   | 1      | 1272.534       | z+1 <sub>10</sub> + □ 1     | 6.15       |
| 1531.653   | 1      | 1531.663       | c <sub>6</sub> + □ 3 ● 2    | -6.72      |
| 1715.752   | 1      | 1715.748       | c <sub>8</sub> + □ 3 ● 2    | 2.27       |
| 1802.775   | 1      | 1802.780       | c <sub>9</sub> + □ 3 ● 2    | -2.83      |
